# Supplementary material
Source: PubMed Central journal article supplement (PMC3840123)
Supplement: NIHMS526188-supplement-1.pdf [file NIHMS526188-supplement-1.pdf]

# **The Microglial Sensome Revealed by Direct RNA Sequencing**

Suzanne E. Hickman, Nathan D. Kingery, Toshiro Ohsumi, Mark Borowsky, Li-chong Wang,  
Terry K. Means & Joseph El Khoury

## **Supplementary Material**

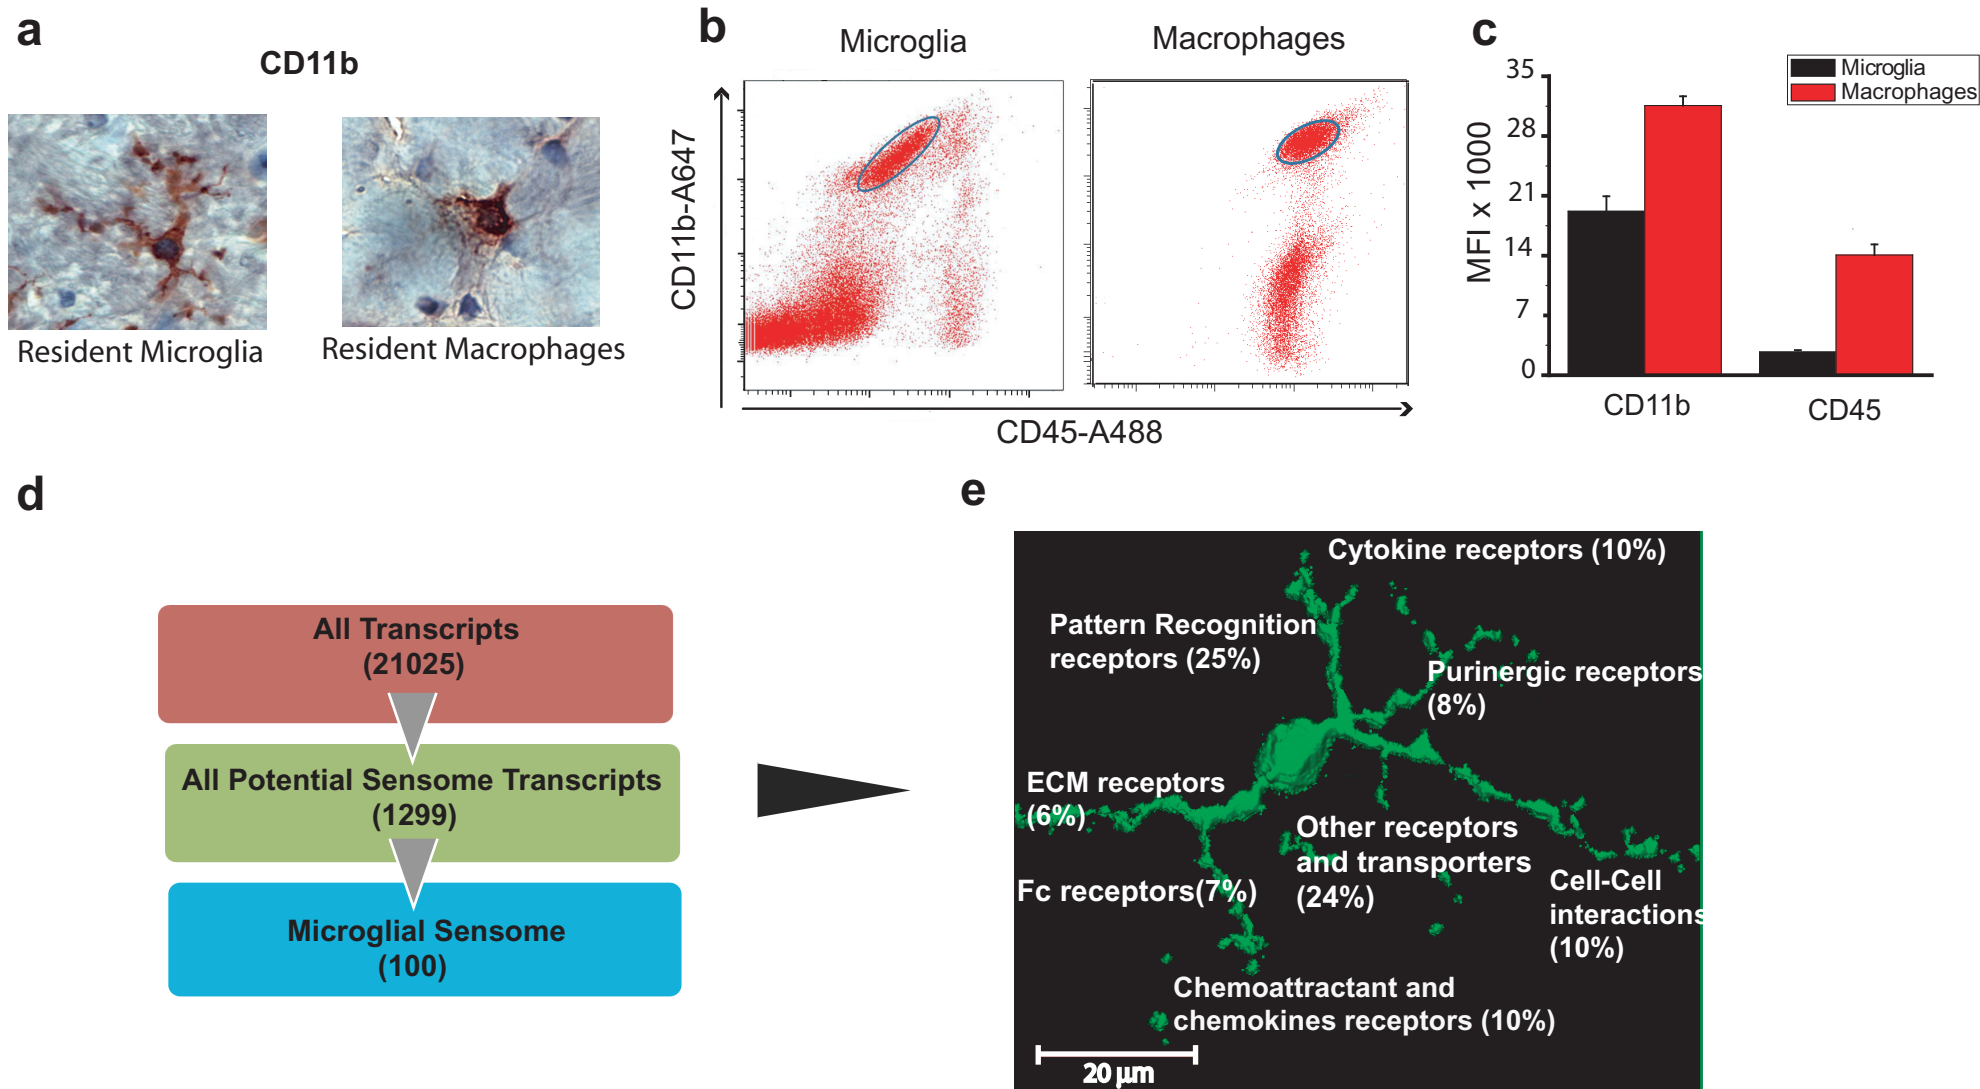

**Supplementary Figure 1: Overview of cell characterization and experimental flow.** **a-b.** Resident microglia and macrophages express CD11b *in situ* and by flow cytometry. Brain and peritoneal sections were stained with anti-CD11b antibodies (red-brown stain) and counterstained with hematoxylin. Microglia and macrophages were stained with Alexa 647-labeled anti-CD11b and Alexa 488-labeled anti-CD45 antibodies. The gates drawn show the populations of microglia and macrophages sorted for DRS. **c.** Microglia express high CD11b and low-to-intermediate CD45, while macrophages expressed higher CD11b and CD45 than microglia. The CD11b axis voltage is set lower for macrophages to allow them to be seen on the dot plot. **d.** Microglia isolated by flow were processed for DRS. Of the 21025 transcripts measured, we used gene ontology (GO) analysis and identified 1299 potential sensome genes. Of these, we selected the top 100 transcripts with the highest enrichment of microglia/brain and termed this gene collection as the microglial "Sensome". **e.** Three dimensional image of a mouse microglia with the summary of the GO analysis of the Sensome showing the various classes of genes identified.

# SCAVENGER RECEPTORS

■ Microglia  
■ Macrophages

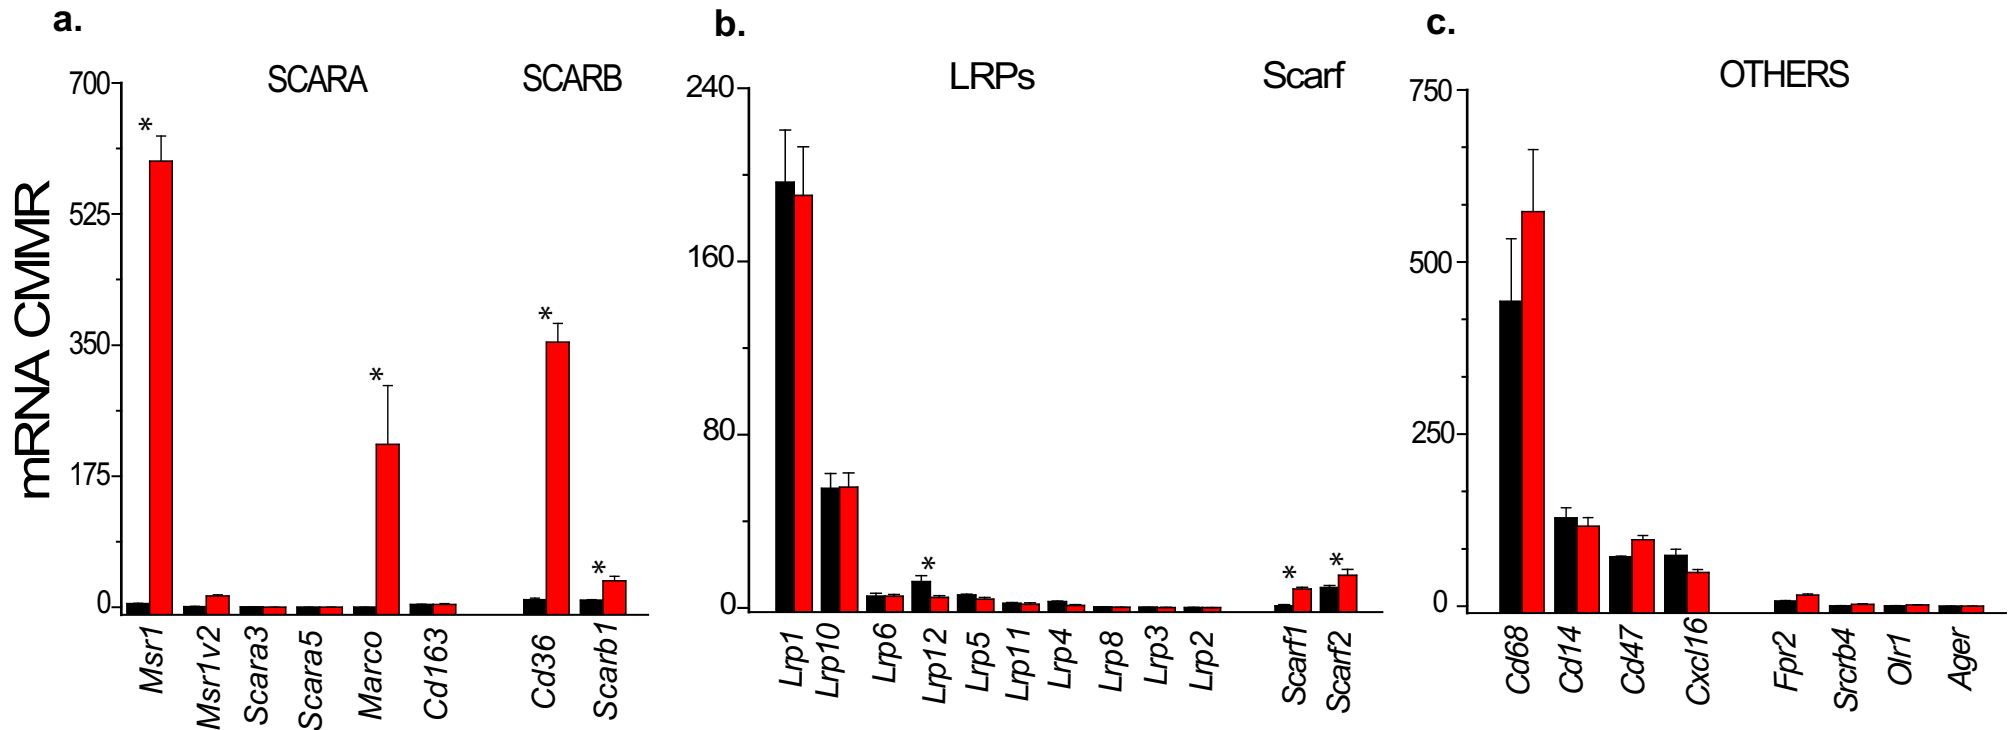

**Supplementary Figure 2. Comparative expression of scavenger receptor genes in microglia (black) and peritoneal macrophages (red).** Data were determined by DRS and are expressed as mRNA copies per million mapped reads (CMMR). a. *Scara* and *Scarb* families of scavenger receptors. Macrophages from normal mice express significantly higher mRNA levels of *MSR1*, *Marco*, and *Cd36* and *Scarb1* than microglia. b. *Lrp* (Low-density lipoprotein-related receptor protein) and *Scarf* families. There are significant differences between microglia and macrophages only in expression of *Lrp12* and *Scarf1* and *Scarf2* scavenger receptor family members. Highest expression is seen with *Lrp1* and *Lrp10*. c. Other scavenger receptors. Microglia and macrophages express similar levels of other scavenger receptors with highest expression seen for *Cd68*, *Cd14*, *Cd47* and *Cxcl16*. \*p values are <0.00001.

## Molecular Signature of Microglia

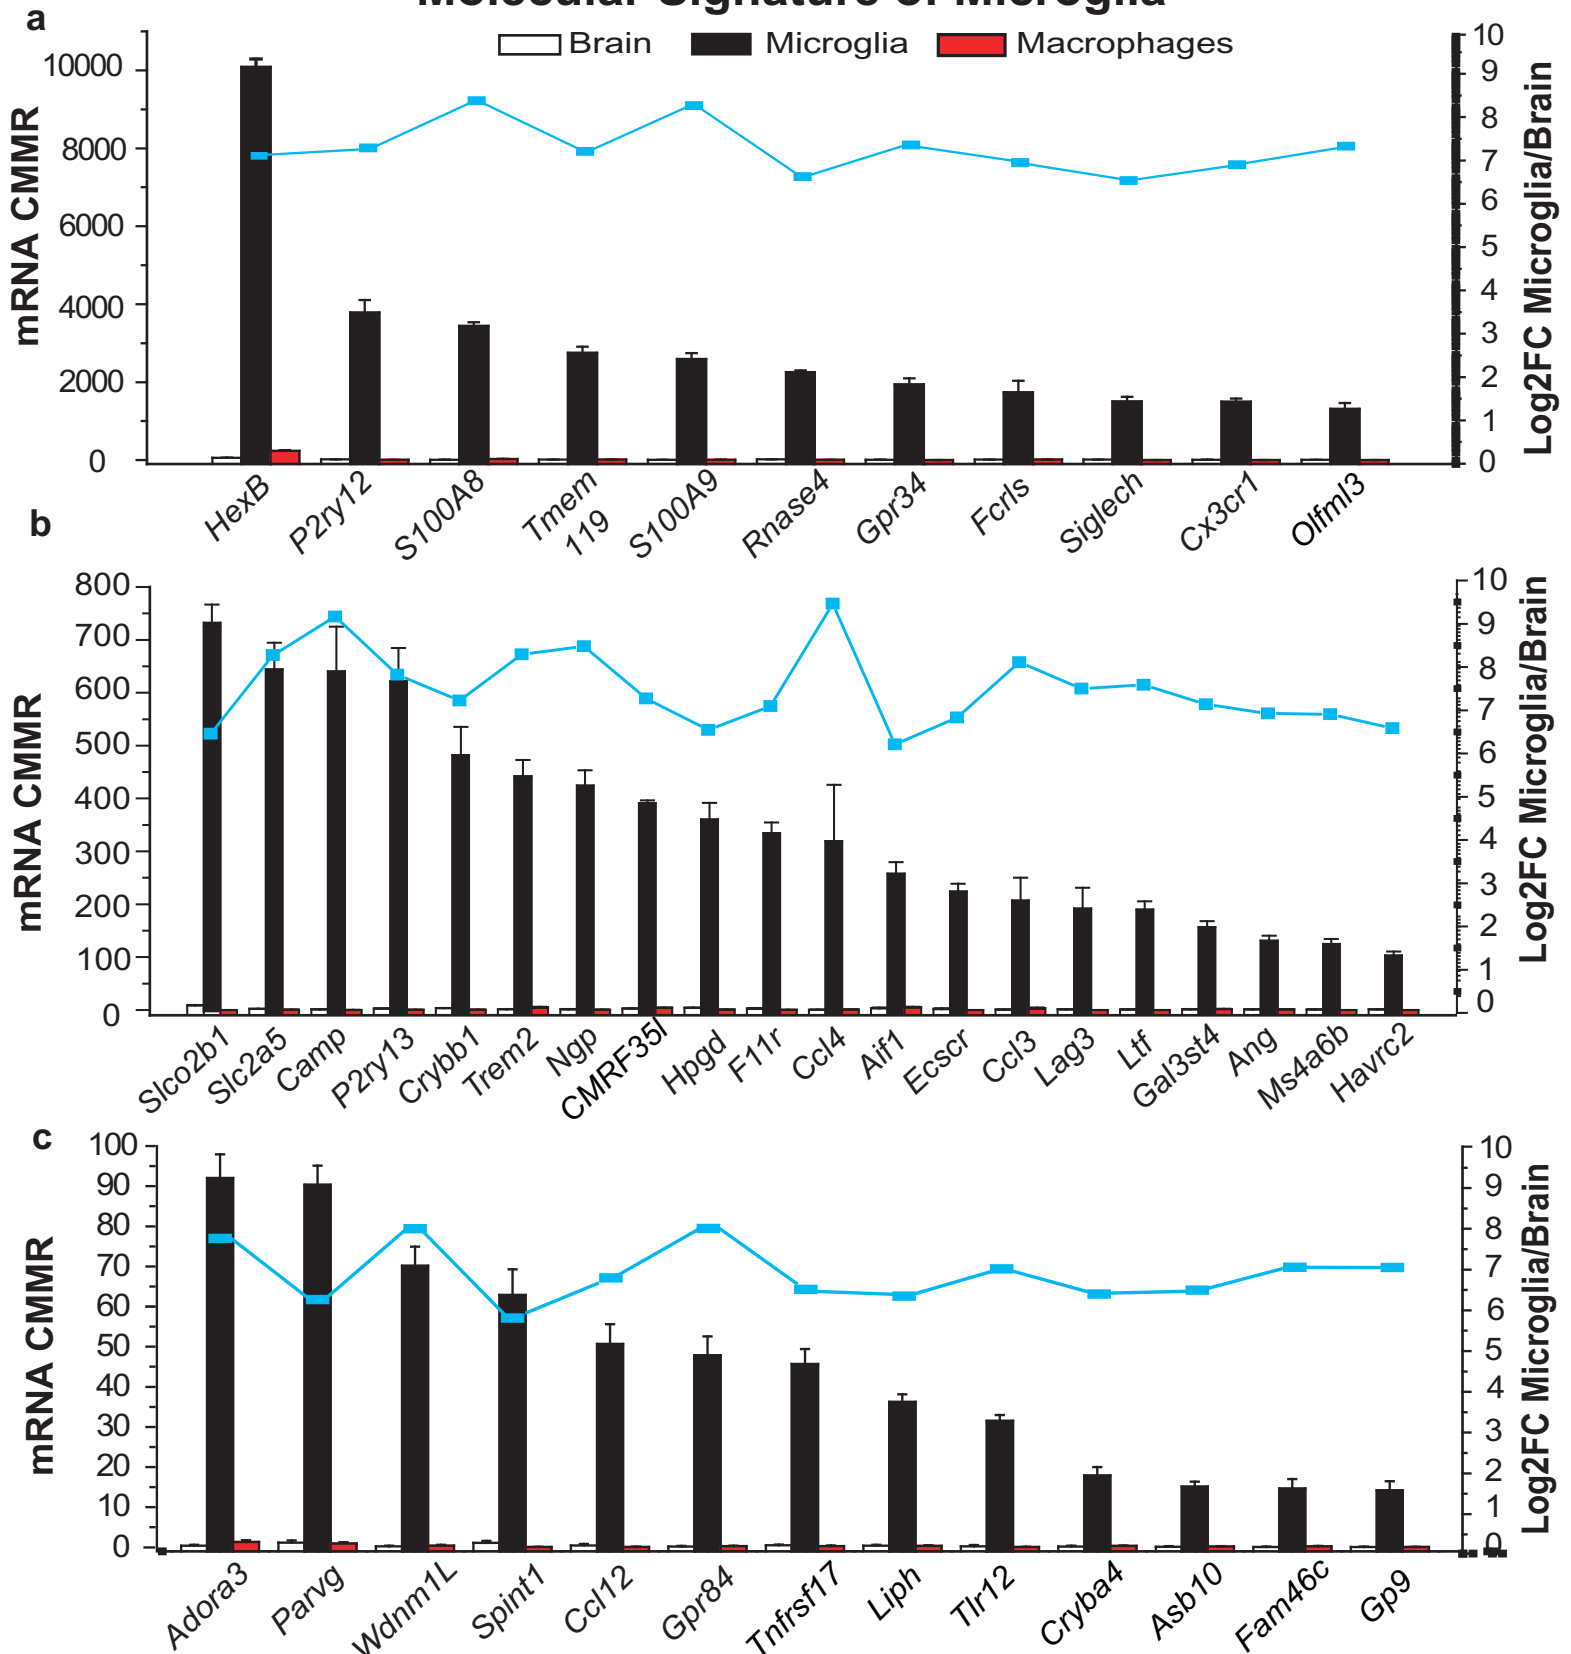

**Supplementary Figure. 3: Molecular signature of microglia.** Microglia signature genes compared to brain and macrophages. Data expressed as mRNA CMMR (copies per million mapped reads) as determined by DRS (left y-axis). 3a presents only transcripts expressed at >1000 CMMR, 3b presents transcripts expressed between 100 to 1000 CMMR, and 3c shows transcripts expressed between 10 to 100 CMMR. In all graphs, the blue line (right y-axis) represents Log2 fold enrichment of microglia over whole brain, indicating a similar level of enrichment for all transcripts shown, regardless of the level of expression.

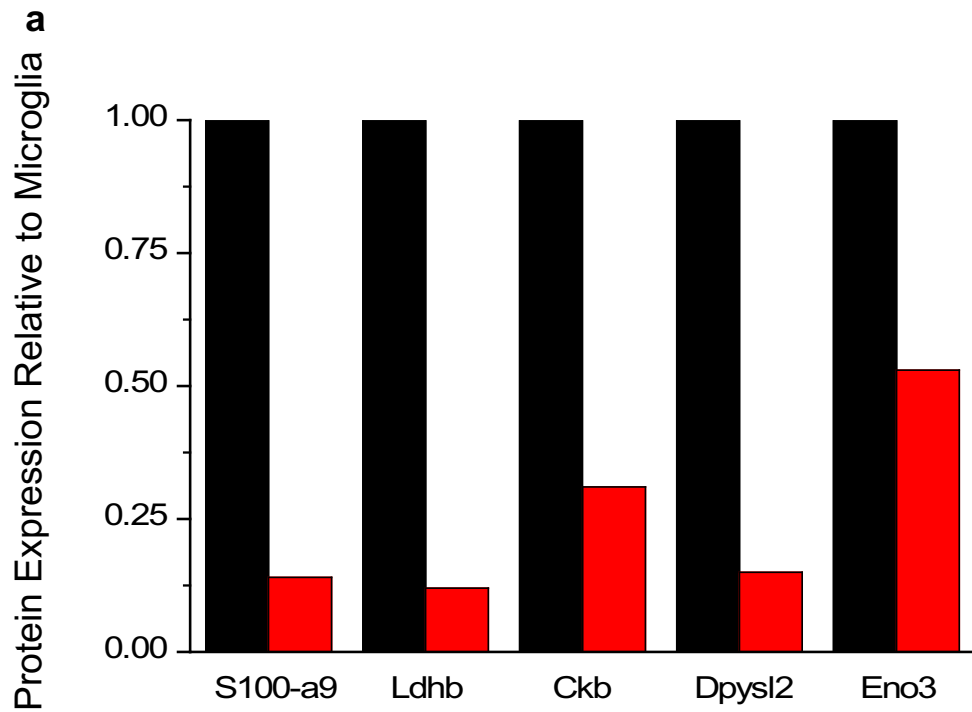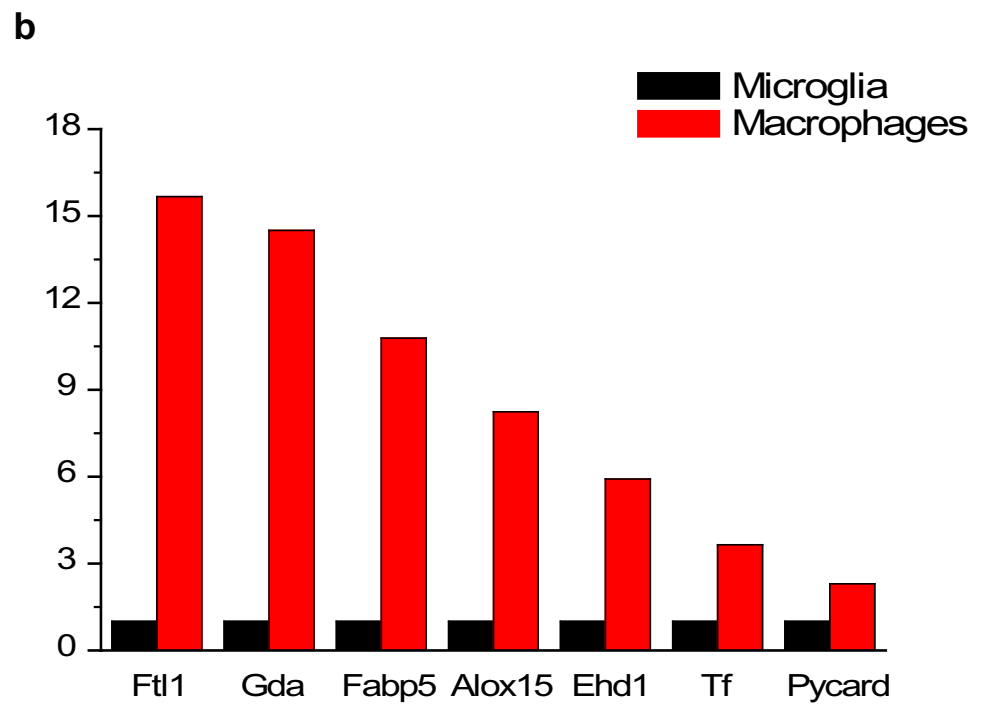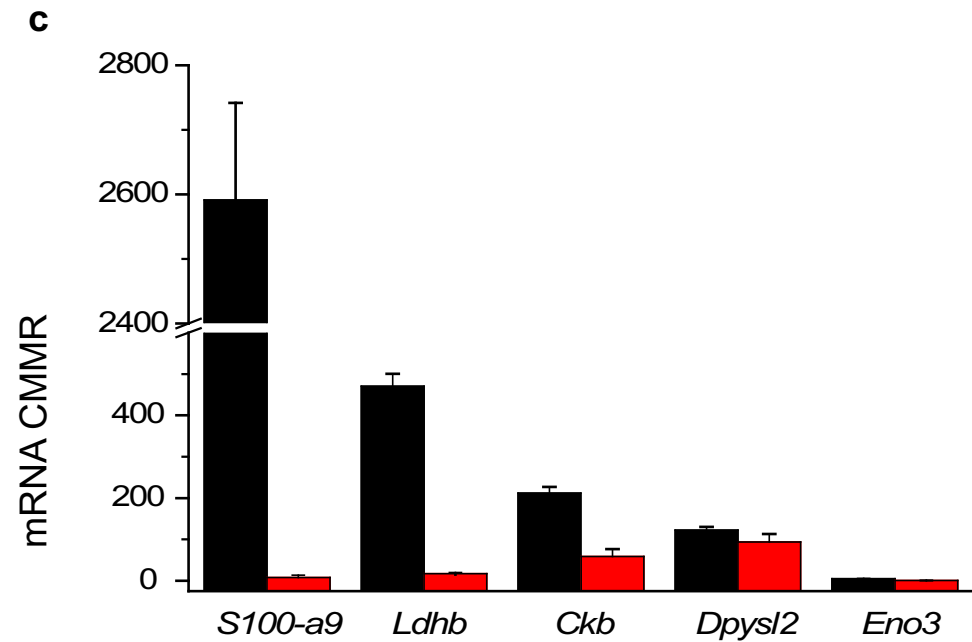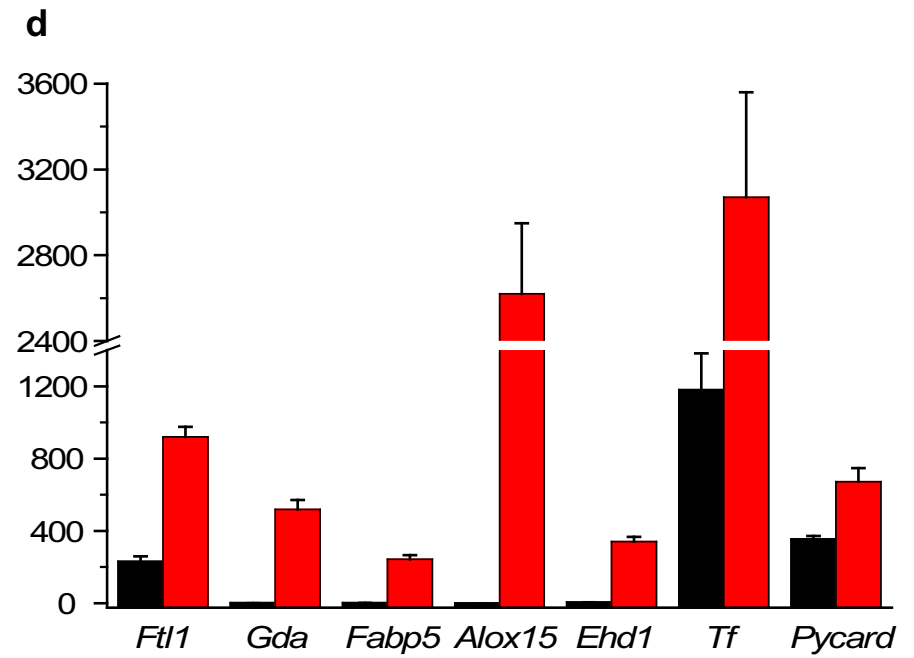

**Supplementary Figure 4: Comparison of expression of proteins identified by 2D DIGE with mRNA levels in microglia and macrophages.**

**a-b.** Expression levels of 2D DIGE-identified proteins in peritoneal macrophages relative to microglia levels (microglia levels set to 1.0).

**c-d.** Expression of mRNA levels corresponding to identified proteins. Expression of mRNA and protein levels follow the same trend.

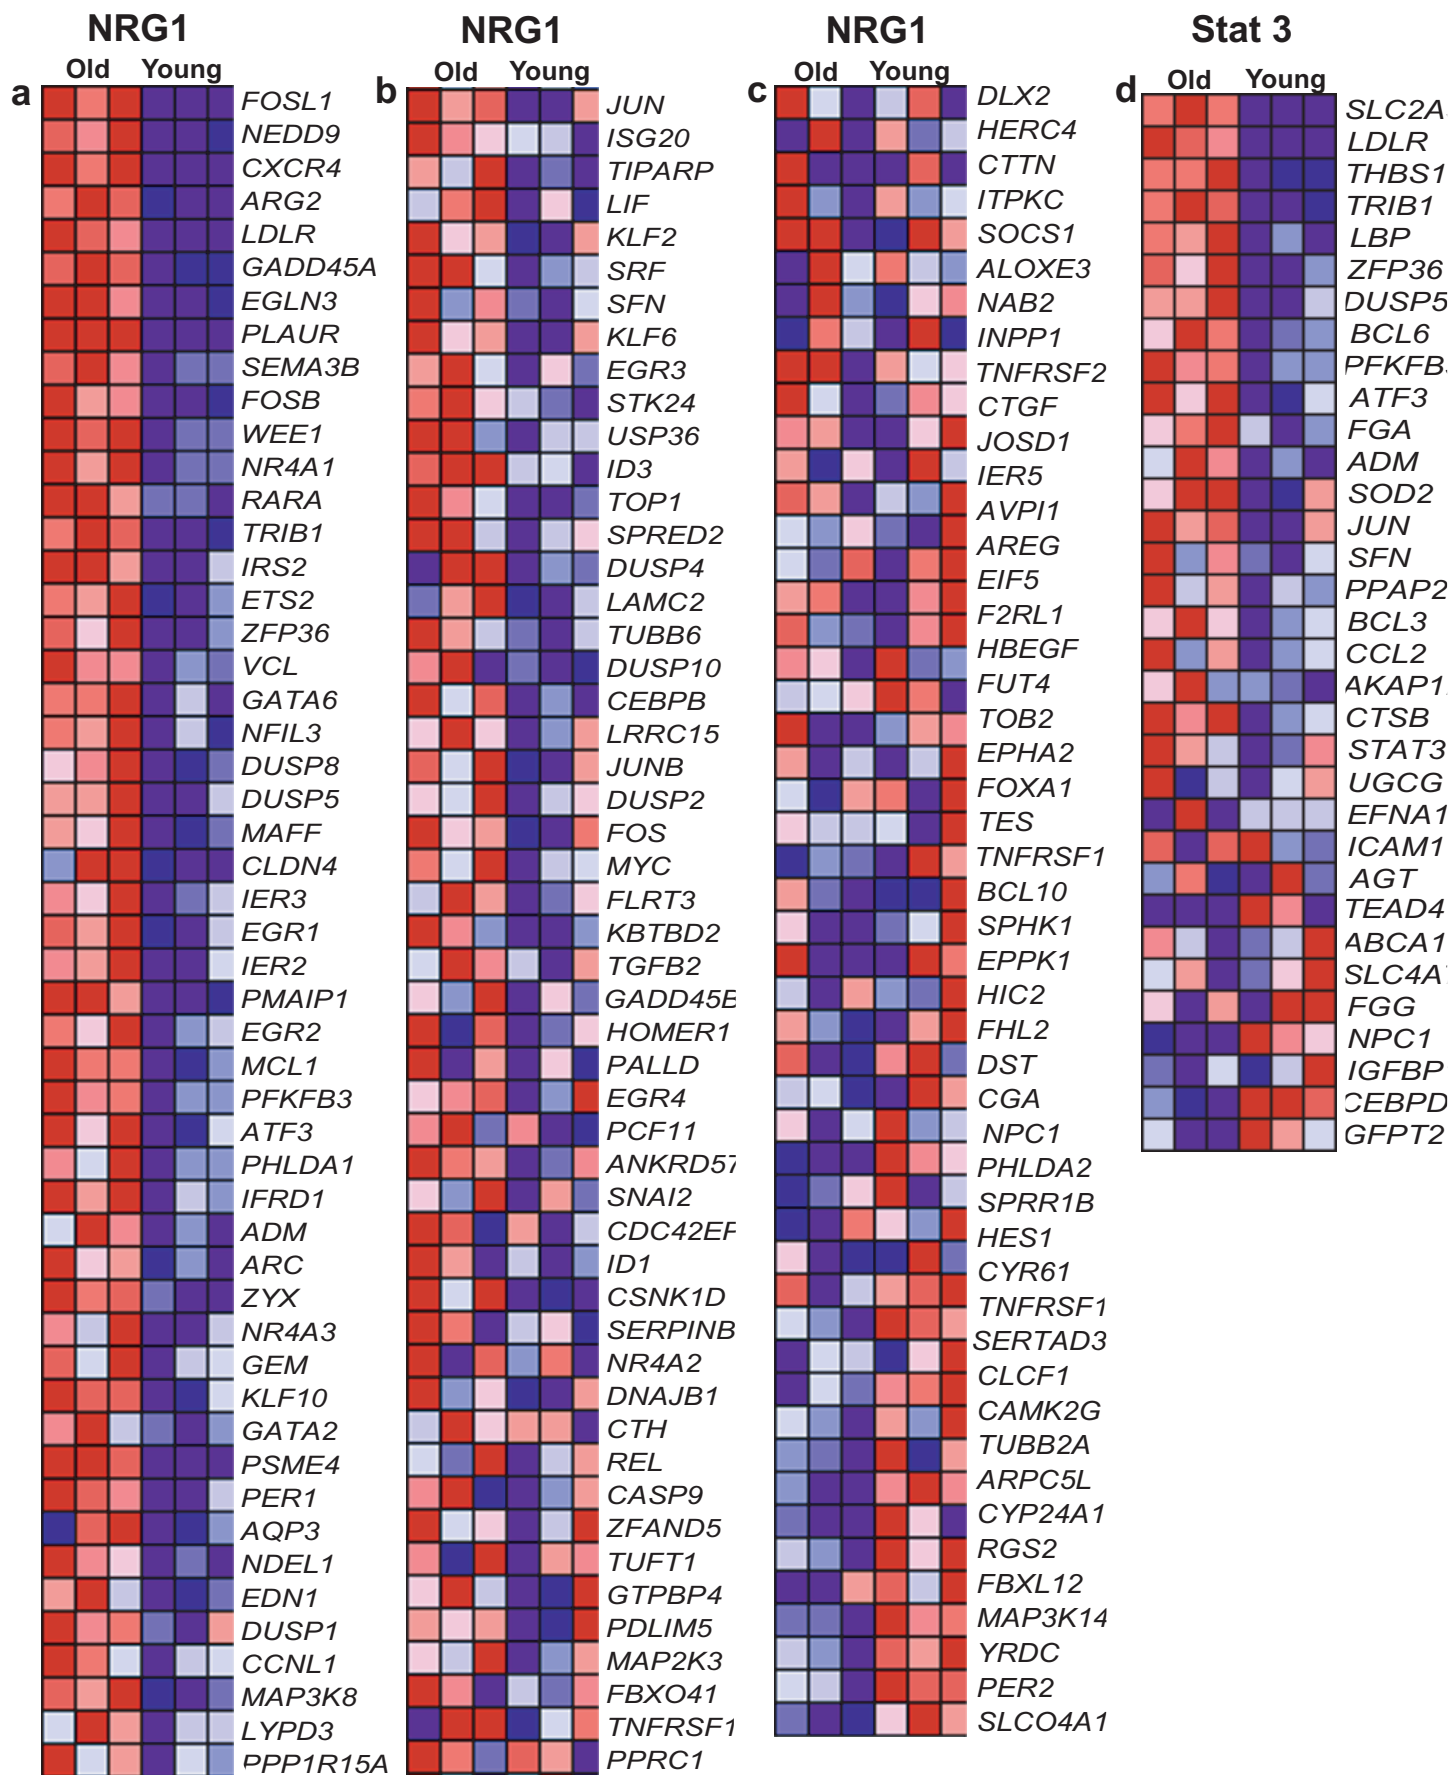

**Supplementary Figure 5: NRG1 and Stat3 are examples of neuroprotective pathways upregulated in microglia from old mice.** Heatmaps depicting expression levels of transcripts of the NRG1 (a-c), and Stat3 (d) pathways in microglia from old and young animals. Enrichment plots for these pathways relative to the whole transcriptome are shown in figure 6.

## Oxidative phosphorylation

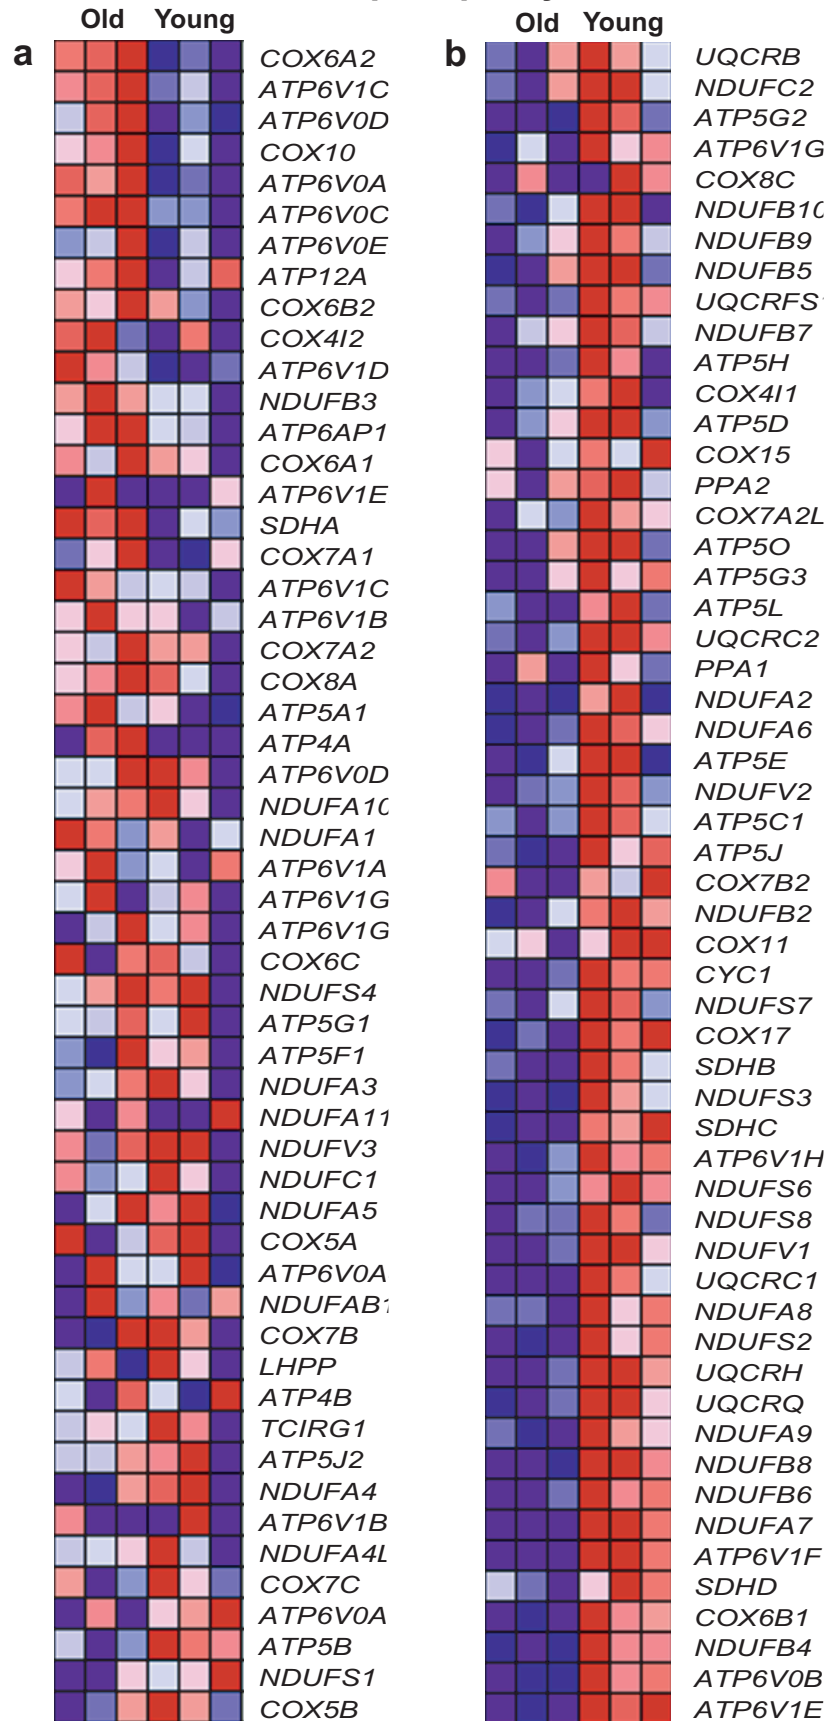

**Supplementary Figure 6 : Oxidative phosphorylation is an example of a potential neurotoxic pathway downregulated in microglia from old mice.** Heatmaps depicting expression levels of transcripts of oxidative phosphorylation pathways (a,b) in microglia from old and young animals. Enrichment plots for this pathway relative to the whole transcriptome is shown in figure 6.

**Supplementary Table 1: The Microglia Sensome**

| Genbank link                            | Gene names                                                     | Mean Brain | Stddev Brain | Mean Microglia | Stddev Microglia | Enrichement Fold M/B | ligand                                  |
|-----------------------------------------|----------------------------------------------------------------|------------|--------------|----------------|------------------|----------------------|-----------------------------------------|
| <b>Purinergic and related receptors</b> |                                                                |            |              |                |                  |                      |                                         |
| NM_027571                               | <i>P2ry12</i> = P2Y purinoceptor 12                            | 20.26      | 1.47         | 3781.22        | 326.80           | 186.63               | Nucleotides                             |
| NM_028808                               | <i>P2ry13</i> = P2Y purinoceptor 13                            | 2.99       | 0.48         | 614.13         | 70.26            | 205.67               | Nucleotides-ADP                         |
| NM_183168                               | <i>P2ry6</i> = P2Y purinoceptor 6                              | 1.81       | 0.52         | 189.12         | 15.26            | 104.71               | Nucleotides-UDP                         |
| NM_011823                               | <i>Gpr34</i> = probable G-protein coupled receptor 34          | 9.91       | 1.03         | 1941.26        | 154.82           | 195.81               | Nucleotides also Lysophosphatidylserine |
| NM_001174169                            | <i>Adora3</i> = adenosine receptor A3                          | 0.41       | 0.21         | 92.00          | 5.96             | 222.02               | Adenosine                               |
| NM_009848                               | <i>Entpd1</i> = ectonucleoside triphosphate diphosphohydrolase | 4.28       | 0.61         | 291.66         | 18.28            | 68.15                | Nucleotides-ATP                         |
| NM_028261                               | <i>Tmem173</i> = transmembrane protein 173 = STING             | 2.40       | 1.20         | 212.87         | 29.99            | 88.61                | Bacterial Cyclic Di-GMP                 |
| NM_001122596                            | purinergic receptor P2Y G-protein coupled                      | 0.31       | 0.16         | 19.10          | 1.36             | 62.37                | Nucleotides                             |
| <b>Cytokine receptors</b>               |                                                                |            |              |                |                  |                      |                                         |
| NM_001037859                            | <i>Csf1r</i> = macrophage colony-stimulating factor 1 receptor | 12.54      | 1.21         | 1634.12        | 127.37           | 130.33               | m-CSF, IL-34                            |
| NM_007782                               | <i>Csf3r</i> = granulocyte colony-stimulating factor receptor  | 2.28       | 0.15         | 81.27          | 3.22             | 35.65                | g-CSF                                   |
| NM_009370                               | <i>Tgfbr1</i> = TGF-beta receptor type-1                       | 8.01       | 0.46         | 661.88         | 111.80           | 82.61                | Tgf-β                                   |
| NM_009371                               | <i>Tgfbr2</i> = TGF-beta receptor type-2                       | 5.62       | 0.34         | 223.96         | 34.43            | 39.87                | Tgf-β                                   |
| NM_010511                               | <i>Ifngr1</i> = interferon gamma receptor 1 precursor          | 9.82       | 0.64         | 610.47         | 27.50            | 62.18                | Inf-γ                                   |



| Genbank link                           | Gene names                                                    | Mean Brain | Stddev Brain | Mean Microglia | Stddev Microglia | Enrichement Fold M/B | ligand                   |
|----------------------------------------|---------------------------------------------------------------|------------|--------------|----------------|------------------|----------------------|--------------------------|
| NM_008348                              | <i>Il10ra</i> = interleukin-10 receptor subunit alpha         | 1.85       | 0.69         | 187.15         | 3.30             | 101.12               | IL-10                    |
| NM_010559                              | <i>Il6ra</i> = interleukin-6 receptor subunit alpha precursor | 1.82       | 0.27         | 112.16         | 10.66            | 61.47                | IL-6                     |
| NM_021887                              | <i>Il21r</i> = interleukin-21 receptor                        | 0.27       | 0.02         | 46.72          | 7.41             | 175.43               | IL-21                    |
| NM_011608                              | <i>Tnfrsf17</i> = tumor necrosis factor receptor superfamily  | 0.49       | 0.19         | 45.69          | 3.74             | 92.71                | BAFF                     |
| NM_011610                              | <i>Tnfrsf1b</i> = tumor necrosis factor receptor superfamily  | 0.35       | 0.28         | 27.07          | 1.45             | 76.49                | TNF                      |
| <b>Chemokine and related receptors</b> |                                                               |            |              |                |                  |                      |                          |
| NM_009987                              | <i>Cx3cr1</i> = CX3C chemokine receptor 1                     | 10.48      | 1.33         | 1493.90        | 87.70            | 142.56               | cx3cl1                   |
| NM_009917                              | <i>Ccr5</i> = C-C chemokine receptor type 5                   | 2.99       | 0.43         | 568.60         | 35.28            | 189.82               | Ccl3, Ccl4, Ccl8, RANTES |
| NM_009779                              | <i>C3ar1</i> = C3a anaphylatoxin chemotactic receptor         | 0.90       | 0.33         | 88.77          | 10.28            | 98.69                | C3a                      |
| NM_001081211                           | <i>Ptafr</i> = platelet-activating factor receptor            | 0.74       | 0.23         | 86.33          | 10.60            | 116.87               | PAF                      |
| NM_001146005                           | <i>Gpr77</i> = C5a anaphylatoxin chemotactic receptor C5L2    | 0.59       | 0.25         | 75.50          | 12.43            | 128.48               | C5a                      |
| NM_008153                              | <i>Cmklr1</i> = chemokine-like receptor 1                     | 0.77       | 0.34         | 62.11          | 3.69             | 80.48                | The chemokine chemerin   |
| NM_021476                              | <i>Cysltr1</i> = cysteinyl leukotriene receptor 1             | 0.36       | 0.20         | 30.19          | 1.20             | 83.54                | LTD4                     |

| Genbank link        | Gene names                                                      | Mean Brain | Stddev Brain | Mean Microglia | Stddev Microglia | Enrichement Fold M/B | ligand                                   |
|---------------------|-----------------------------------------------------------------|------------|--------------|----------------|------------------|----------------------|------------------------------------------|
| NM_017466           | <i>Ccr12</i> = C-C chemokine receptor-like 2                    | 0.63       | 0.34         | 31.85          | 8.92             | 50.51                | Chemerin                                 |
| NM_026036           | <i>Cmtm6</i> = CKLF-like MARVEL transmembrane domain-containing | 10.44      | 0.91         | 451.56         | 99.05            | 43.27                | May bind cxcl7                           |
| NM_007577           | <i>C5ar1</i> = C5a anaphylatoxin chemotactic receptor           | 0.73       | 0.24         | 29.55          | 2.39             | 40.37                | AKA CD88 C5a Staph. Aureus               |
| <b>Fc receptors</b> |                                                                 |            |              |                |                  |                      |                                          |
| NM_010188           | <i>Fcgr3</i> = low affinity immunoglobulin gamma Fc region      | 3.44       | 0.88         | 1004.50        | 140.04           | 292.13               | Fc portion of IgG                        |
| NM_010185           | <i>Fcer1g</i> = high affinity immunoglobulin epsilon receptor   | 3.48       | 0.58         | 837.23         | 91.60            | 240.28               | Fc portion of IgE                        |
| NM_010187           | <i>Fcgr2b</i> = low affinity immunoglobulin gamma Fc region     | 3.65       | 1.05         | 410.55         | 10.62            | 112.60               | Fc portion of IgG-Low affinity           |
| NM_010186           | <i>Fcgr1</i> = high affinity immunoglobulin gamma Fc receptor I | 1.64       | 0.12         | 289.36         | 46.37            | 176.87               | Fc portion of IgG-High affinity          |
| NM_133978           | <i>Cmtm7</i> = CKLF-like MARVEL transmembrane domain            | 2.39       | 1.12         | 244.96         | 27.08            | 102.44               | IgM ?                                    |
| NM_178165           | <i>Fcrl1</i> = Fc receptor-like protein 1                       | 0.40       | 0.39         | 48.69          | 3.01             | 120.57               | IgG?                                     |
| NM_144559           | <i>Fcgr4</i> =Fc receptor IgG low affinity IV                   | 0.17       | 0.14         | 21.43          | 1.4              | 126.37               | Binds Fc fragment of IgG; PMID: 20974962 |

| Genbank link                                     | Gene names                                                      | Mean Brain | Stddev Brain | Mean Microglia | Stddev Microglia | Enrichement Fold M/B | ligand                                                |
|--------------------------------------------------|-----------------------------------------------------------------|------------|--------------|----------------|------------------|----------------------|-------------------------------------------------------|
| <b>Pattern recognition and related receptors</b> |                                                                 |            |              |                |                  |                      |                                                       |
| NM_009151                                        | <i>Selplg</i> = P-selectin glycoprotein ligand 1                | 12.55      | 0.80         | 1446.83        | 180.23           | 115.32               | Enterovirus 71, Hand foot and mouth disease AKA CD162 |
| NM_010745                                        | <i>Ly86</i> = lymphocyte antigen 86 precursor                   | 6.01       | 1.82         | 1073.54        | 95.10            | 178.66               | AKA MD1 LPS                                           |
| NM_009853                                        | <i>Cd68</i> = macroscialin                                      | 5.61       | 0.91         | 442.90         | 90.95            | 78.94                | Ox LDL, SR                                            |
| NM_031254                                        | <i>Trem2</i> = triggering receptor expressed on myeloid cells 2 | 1.55       | 0.26         | 442.09         | 30.70            | 284.64               | Apoptotic neurons                                     |
| NM_008533                                        | <i>Cd180</i> = CD180 antigen                                    | 1.06       | 0.61         | 248.03         | 33.78            | 234.41               | LPS AKA rp105                                         |
| NM_011905                                        | <i>Tlr2</i> = toll-like receptor 2                              | 1.28       | 0.11         | 195.84         | 14.42            | 152.53               | pathogens and endogenous ligands                      |
| NM_007645                                        | <i>Cd37</i> = leukocyte antigen CD37                            | 0.67       | 0.41         | 158.79         | 21.69            | 236.40               | $\beta$ -glucan ? interacts with dectin-1             |
| NM_133211                                        | <i>Tlr7</i> = toll-like receptor 7                              | 1.20       | 0.40         | 133.53         | 8.94             | 111.10               | pattern recognition receptor                          |
| NM_009841                                        | <i>Cd14</i> = monocyte differentiation antigen CD14             | 0.88       | 0.40         | 128.14         | 14.64            | 145.99               | pattern recognition receptor                          |
| NM_001204241                                     | <i>Clec4a3</i> = dendritic cell inhibitory receptor 3           | 1.56       | 0.31         | 106.20         | 1.22             | 67.92                | HIV AKA DCIR3                                         |
| NM_021297                                        | <i>Tlr4</i> = toll-like receptor 4                              | 0.84       | 0.16         | 47.67          | 4.89             | 56.82                | Bacterial, fungal and parasitic ligands               |
| NM_205820                                        | <i>Tlr13</i> = toll-like receptor 13                            | 0.25       | 0.20         | 10.77          | 1.05             | 43.41                | Bacterial 23s rRNA                                    |
| NM_021364                                        | <i>Clec5a</i> = C-type lectin domain family 5 member A          | 1.33       | 0.65         | 103.31         | 10.29            | 77.70                | Japanese Encephalitis Virus, Dengue Virus             |
| NM_134250                                        | <i>Havcr2</i> = hepatitis A virus cellular receptor 2 homolog   | 1.177      | 0.42         | 102.79         | 7.88             | 87.33                | hepatitis A virus, AKA Tim3 also binds galectin 9     |
| NM_020008                                        | <i>Clec7a</i> = C-type lectin domain family 7 member A          | 1.16       | 0.33         | 90.46          | 13.78            | 77.94                | $\beta$ glucan and yeast                              |

| Genbank link         | Gene names                                                      | Mean Brain | Stddev Brain | Mean Microglia | Stddev Microglia | Enrichement Fold M/B | ligand                                            |
|----------------------|-----------------------------------------------------------------|------------|--------------|----------------|------------------|----------------------|---------------------------------------------------|
| NM_023158            | <i>Cxcl16</i> = C-X-C motif chemokine 16                        | 1.01       | 0.12         | 73.65          | 9.26             | 73.20                | G+ and G- bacteria, OxLDL, MTB                    |
| NM_007649            | <i>Cd48</i> = CD48 antigen                                      | 0.40       | 0.23         | 54.03          | 3.10             | 136.41               | MTB, E-coli                                       |
| NM_008522            | <i>Ltf</i> = lactotransferrin                                   | 1.09       | 0.36         | 189.98         | 15.34            | 174.58               | AGEs, Bacteria                                    |
| NM_010545            | <i>Cd74</i> = H-2 class II histocompatibility antigen gamma     | 8.62       | 1.24         | 561.40         | 138.82           | 65.12                | Bacteria (H. Pylori), HIV                         |
| NM_178924            | <i>Upk1b</i> = uroplakin-1b                                     | 1.76       | 0.44         | 92.79          | 14.57            | 52.63                | Bacteria (E. Coli)                                |
| NM_205823            | <i>Tlr12</i> = toll-like receptor 12                            | 0.24       | 0.34         | 31.52          | 1.47             | 131.90               | Parasites (Taenia solium)                         |
| NM_030682            | <i>Tlr1</i> = toll-like receptor 1                              | 0.40       | 0.06         | 26.25          | 2.36             | 65.62                | Bacterial, fungal and parasitic ligands           |
| NM_153510            | <i>Pilra</i> = paired immunoglobulin-like type 2 receptor alpha | 0.58       | 0.11         | 30.53          | 2.05             | 52.39                | CD99, HSV-1, NPDC1, COLEC12, PANP (neural tissue) |
| NM_011604            | <i>Tlr6</i> = toll-like receptor 6                              | 0.48       | 0.04         | 22.71          | 0.53             | 46.95                | Microbial and Endogenous ligands                  |
| NM_001033632         | <i>Ifitm6</i> = interferon induced transmembrane protein 6      | 0.83       | 0.52         | 34.99          | 0.76             | 42.06                | May regulate viral entry                          |
| <b>ECM receptors</b> |                                                                 |            |              |                |                  |                      |                                                   |
| NM_001082960         | <i>Itgam</i> = integrin alpha-M                                 | 7.25       | 0.36         | 715.13         | 70.03            | 98.57                | Fibrinogen, other ECMs and Amyloid $\beta$        |

| Genbank link                                                  | Gene names                                                       | Mean Brain | Stddev Brain | Mean Microglia | Stddev Microglia | Enrichement Fold M/B | ligand                                  |
|---------------------------------------------------------------|------------------------------------------------------------------|------------|--------------|----------------|------------------|----------------------|-----------------------------------------|
| NM_008404                                                     | <i>Itgb2</i> = integrin beta-2                                   | 2.10       | 0.58         | 354.39         | 29.02            | 169.03               | CD18 binds Amyloid $\beta$ and ECM      |
| NM_010580                                                     | <i>Itgb5</i> = integrin beta-5                                   | 11.52      | 1.66         | 592.77         | 39.96            | 51.44                | Adenovirus, Vitronectin                 |
| NM_010130                                                     | <i>Emr1</i> = EGF-like module-containing mucin-like hormone      | 3.77       | 0.70         | 495.04         | 25.71            | 131.35               | AKA F4/80, Hormones ? ECM adhesion ?    |
| NM_001033141                                                  | <i>Ecscr</i> = endothelial cell-specific chemotaxis regulator    | 2.17       | 0.99         | 223.88         | 15.07            | 103.32               | ECM?, Intracellular filamin             |
| NM_178611                                                     | <i>Lair1</i> = Leukocyte-associated immunoglobulin-like          | 2.30       | 0.15         | 170.92         | 11.29            | 74.45                | Collagens                               |
| <b>Endogenous ligands receptors, sensors and transporters</b> |                                                                  |            |              |                |                  |                      |                                         |
| NM_178706                                                     | <i>Siglech</i> = sialic acid binding Ig-like lectin H            | 13.55      | 0.57         | 1501.57        | 124.57           | 110.81               | Sialic acid                             |
| NM_175316                                                     | <i>Slco2b1</i> = solute carrier organic anion transporter family | 9.10       | 0.40         | 725.06         | 41.72            | 79.69                | Organic anions sensing/uptake/transport |
| NM_019741                                                     | <i>Slc2a5</i> = solute carrier family 2, facilitated glucose     | 2.27       | 0.29         | 636.67         | 57.71            | 280.91               | Glucose AKA Glut5                       |
| NM_001159301                                                  | <i>Lgals9</i> = galectin-9                                       | 3.60       | 0.88         | 231.94         | 32.35            | 64.44                | Urate, glycans                          |
| NM_183031                                                     | <i>Gpr183</i> = G-protein coupled receptor 183                   | 1.25       | 0.69         | 163.55         | 10.97            | 130.61               | oxysterols                              |
| NM_019432                                                     | <i>Tmem37</i> = voltage-dependent calcium channel gamma-like     | 2.15       | 0.71         | 161.97         | 16.03            | 75.50                | inorganic cations ?                     |
| NM_021293                                                     | <i>Cd33</i> = myeloid cell surface antigen CD33                  | 0.74       | 0.16         | 56.56          | 0.66             | 76.18                | sialic acid sensing AKA siglec 3        |

| Genbank link                  | Gene names                                                   | Mean Brain | Stddev Brain | Mean Microglia | Stddev Microglia | Enrichement Fold M/B | ligand                                                      |
|-------------------------------|--------------------------------------------------------------|------------|--------------|----------------|------------------|----------------------|-------------------------------------------------------------|
| NM_030720                     | <i>Gpr84</i> = G-protein coupled receptor 84                 | 0.18       | 0.15         | 47.84          | 4.75             | 263.50               | medium chain fatty acids                                    |
| NM_011405                     | <i>Slc7a7</i> = Y+L amino acid transporter 1                 | 0.91       | 0.28         | 81.27          | 2.45             | 89.28                | Amino acids                                                 |
| NM_013706                     | <i>Cd52</i> = CAMPATH-1 antigen precursor                    | 4.57       | 0.66         | 392.64         | 43.16            | 86.00                | C1q                                                         |
| NM_145581                     | <i>Siglec5</i> = sialic acid-binding Ig-like lectin 5        | 0.32       | 0.18         | 20.49          | 1.099            | 64.79                | Sialic acid                                                 |
| NM_008339                     | <i>Cd79b</i> = B-cell antigen receptor complex-associated    | 0.37       | 0.13         | 20.32          | 1.44             | 55.63                | Involved in antigen binding, a component of the BCR complex |
| NM_030696                     | <i>Slc16a3</i> = monocarboxylate transporter 4               | 1.03       | 0.46         | 46.64          | 5.06             | 45.07                | Monocarboxylate                                             |
| <b>Cell-Cell Interactions</b> |                                                              |            |              |                |                  |                      |                                                             |
| NM_010493                     | <i>Icam1</i> = intercellular adhesion molecule 1             | 1.60       | 0.66         | 64.16          | 5.66             | 40.20                | LFA-1 <sup>96</sup> , Rhinoviruses                          |
| NM_023892                     | <i>Icam4</i> = intercellular adhesion molecule 4             | 1.55       | 0.65         | 64.12          | 5.70             | 41.45                | β2 Integrins                                                |
| NM_013489                     | <i>Cd84</i> = SLAM family member 5 precursor                 | 0.13       | 0.05         | 29.11          | 0.87             | 228.87               | CD84 (Homophilic)                                           |
| NM_008479                     | <i>Lag-3</i> = lymphocyte activation gene 3                  | 1.16       | 0.36         | 191.56         | 39.56            | 164.66               | binds MHC II                                                |
| NM_019388                     | <i>Cd86</i> = T-lymphocyte activation antigen CD86 precursor | 1.14       | 0.26         | 155.07         | 6.44             | 135.22               | binds CD28 on T Cells                                       |

| Genbank link                                  | Gene names                                                    | Mean Brain | Stddev Brain | Mean Microglia | Stddev Microglia | Enrichement Fold M/B | ligand                                                                     |
|-----------------------------------------------|---------------------------------------------------------------|------------|--------------|----------------|------------------|----------------------|----------------------------------------------------------------------------|
| NM_011210                                     | <i>Ptpcr</i> = receptor-type tyrosine-protein phosphatase C   | 1.21       | 0.24         | 105.93         | 10.51            | 87.52                | galectin-1 involved in cell-cell interactions, CMV                         |
| NM_011662                                     | <i>Dap12</i> = TYRO protein tyrosine kinase-binding protein   | 5.34       | 0.83         | 831.82         | 79.032           | 155.76               | Lipids from membranes AKA CD300L                                           |
| NM_021349                                     | <i>Tnfrsf13b</i> = TNF receptor superfamily member AKA TACI   | 1.99       | 0.16         | 91.90          | 9.67             | 46.08                | BlyS                                                                       |
| NM_011608                                     | <i>Tnfrsf17</i> = TNF receptor superfamily member 17 AKA BCMA | 0.49       | 0.19         | 45.69          | 3.74             | 92.71                | BAFF                                                                       |
| NM_001043317                                  | <i>Cd22</i> = B-cell receptor CD22                            | 0.17       | 0.15         | 12.80          | 1.82             | 76.46                | CD45, Sialic acids, IgM                                                    |
| <b>Potential sensors but no known ligands</b> |                                                               |            |              |                |                  |                      |                                                                            |
| NM_146162                                     | <i>Tmem119</i> = transmembrane protein 119 precursor          | 15.55      | 0.95         | 2753.65        | 154.73           | 177.07               | Regulation of osteoblast function-AKA OBIF, TM protein so potential sensor |
| NM_007651                                     | <i>Cd53</i> = leukocyte surface antigen CD53                  | 6.58       | 0.58         | 1516.56        | 94.31            | 230.63               | Shown in a microglial cell line tetraspanin no known sensing function      |
| NM_001159572                                  | Platelet receptor Gi24                                        | 4.38       | 0.34         | 351.84         | 47.19            | 80.29                | Unknown function. Not known to be expressed on microglia aka Dies1         |

| Genbank link | Gene names                                                        | Mean Brain | Stddev Brain | Mean Microglia | Stddev Microglia | Enrichement Fold M/B | ligand                                                                                          |
|--------------|-------------------------------------------------------------------|------------|--------------|----------------|------------------|----------------------|-------------------------------------------------------------------------------------------------|
| NM_029612    | <i>Slamf9</i> = SLAM family member 9 precursor                    | 0.59       | 0.39         | 139.72         | 12.24            | 236.47               | Unknown but Measles virus and bacterial ligands bind Slamf1                                     |
| NM_001033780 | Transmembrane protein <i>C1orf162</i> homolog                     | 0.27       | 0.15         | 65.38          | 4.75             | 244.44               | Unknown function. Not known to be expressed on microglia                                        |
| NM_001170332 | <i>Clec4a2</i> = C-type lectin domain family 4 member A2 AKA Dcir | 0.96       | 0.54         | 50.24          | 3.01             | 52.25                | Unknown ligand. Deficiency causes autoimmune disease due to excess expansion of dendritic cells |
| NM_001190310 | <i>Clec4b1</i> = C-type lectin domain family 4, member b1 isoform | 0.31       | 0.21         | 30.61          | 0.68             | 99.62                | Unknown Ligand but associates with Fcgr                                                         |
| NM_001081239 | <i>Lilra5</i> = leukocyte immunoglobulin-like receptor            | 0.32       | 0.23         | 28.54          | 2.40             | 89.37                | Natural ligand unknown but cross-linking on macrophages upregulates TNF, Il1b, IL6              |
| NM_025376    | <i>Tmem8c</i> = transmembrane protein 8C                          | 0.28       | 0.24         | 14.70          | 2.05             | 53.37                | Unknown function. Not known to be expressed on microglia                                        |
| NM_027965    | <i>Gpr160</i> = probable G-protein coupled receptor 160           | 0.71       | 0.14         | 31.63          | 4.38             | 44.57                | Unknown function. Not known to be expressed on microglia                                        |
| NM_001099332 | <i>Cd101</i> = immunoglobulin superfamily member 2                | 0.27       | 0.15         | 10.72          | 0.76             | 40.08                | Natural ligand unknown, involved in T cell activation                                           |

All p-values for comparisons between microglia vs. brain for the above transcripts were  $<10^{-5}$  using the EdgeR analysis.



| Supplementary Table 2. Microglia Sensome Genes Expression in Macrophages |            |          |             |          |                      |           |
|--------------------------------------------------------------------------|------------|----------|-------------|----------|----------------------|-----------|
| Top 25 Genes in Microglia: Figure 2c                                     |            |          |             |          |                      |           |
| Gene Name                                                                | Microglia  | SD Mic   | Macrophages | SD Mac   | Log2 Fold Difference | p value*  |
| <i>Hexb</i>                                                              | 10088.77   | 204.6    | 232.81      | 20.23    | 5.44                 | *         |
| <i>P2ry12</i>                                                            | 3781.22    | 326.8    | 4.6         | 0.84     | 9.67                 | *         |
| <i>S100a8</i>                                                            | 3442.67    | 91.53    | 26.36       | 8.22     | 7.03                 | *         |
| <i>Tmem119</i>                                                           | 2753.65    | 154.73   | 12.09       | 2.89     | 7.84                 | *         |
| <i>S100a9</i>                                                            | 2591.5     | 150.21   | 8.01        | 5.53     | 8.27                 | *         |
| <i>Rnase4</i>                                                            | 2258.13    | 44.69    | 6.19        | 1.46     | 8.51                 | *         |
| <i>Gpr34</i>                                                             | 1941.26    | 154.82   | 0.31        | 0.14     | 12.18                | *         |
| <i>Fcrls</i>                                                             | 1735.36    | 300.71   | 12.5        | 1.52     | 7.12                 | *         |
| <i>Siglech</i>                                                           | 1501.57    | 124.57   | 0.1         | 0.13     | 13.72                | *         |
| <i>Cx3cr1</i>                                                            | 1493.9     | 87.7     | 0.32        | 0.19     | 12.2                 | *         |
| <i>Olfml3</i>                                                            | 1310.27    | 157.74   | 0.04        | 0.06     | 14.93                | *         |
| <i>Fos</i>                                                               | 1196.3     | 601.78   | 32.5        | 14.2     | 5.2                  | *         |
| <i>Slco2b1</i>                                                           | 725.06     | 41.72    | 0.08        | 0.08     | 13.37                | *         |
| <i>Tgfb1</i>                                                             | 661.88     | 111.8    | 20.28       | 3.1      | 5.03                 | *         |
| <i>Slc2a5</i>                                                            | 636.67     | 57.71    | 0.6         | 0.29     | 10                   | *         |
| <i>Camp</i>                                                              | 633        | 91.94    | 0.11        | 0.12     | 11.88                | *         |
| <i>P2ry13</i>                                                            | 614.13     | 70.26    | 0.42        | 0.2      | 10.47                | *         |
| <i>Itgb5</i>                                                             | 592.77     | 39.96    | 0.73        | 0.33     | 9.6                  | *         |
| <i>Crybb1</i>                                                            | 481.82     | 46.25    | 0.67        | 0.28     | 9.45                 | *         |
| <i>Syng1</i>                                                             | 452.94     | 29.29    | 16.15       | 1.68     | 4.81                 | *         |
| <i>Trem2</i>                                                             | 442.09     | 30.7     | 5           | 1.06     | 6.48                 | *         |
| <i>Gpr56</i>                                                             | 434.39     | 34.52    | 0.05        | 0.06     | 12.92                | *         |
| <i>Ngp</i>                                                               | 424.46     | 28.9     | 0.54        | 0.19     | 9.19                 | *         |
| <i>CMRF35-like molecule</i>                                              | 391.42     | 5.18     | 4.17        | 0.59     | 6.55                 | *         |
| <i>Hpgd</i>                                                              | 360.2      | 31.59    | 0.75        | 0.33     | 8.78                 | *         |
| Top 25 Genes in Macrophages: Figure 2d                                   |            |          |             |          |                      |           |
| Gene Name                                                                | Microglia  | SD Mic   | Macrophages | SD Mac   | Log2 Fold Difference | p value*  |
| <i>Fn1</i>                                                               | 9.66       | 1.97     | 15327.25    | 1490.36  | 10.65                | *         |
| <i>Slpi</i>                                                              | 11.47      | 1.36     | 13995.18    | 1602.76  | 10.26                | *         |
| <i>Saa3</i>                                                              | 0.59       | 0.54     | 9819.21     | 3761.02  | 13.64                | *         |
| <i>Prg4</i>                                                              | 0.73       | 0.15     | 5882.87     | 440.07   | 12.95                | *         |
| <i>Cfp</i>                                                               | 7.78       | 2.17     | 5003.61     | 832.46   | 9.31                 | *         |
| <i>Cd5l</i>                                                              | 1.18       | 0.18     | 4563.08     | 573.53   | 11.84                | *         |
| <i>Gm11428</i>                                                           | 30.61      | 8.17     | 4340.94     | 669.69   | 7.13                 | *         |
| <i>Crip1</i>                                                             | 47.51      | 6.92     | 3745.57     | 374.16   | 6.3                  | *         |
| <i>Pf4</i>                                                               | 47.44      | 7.34     | 3245.96     | 202.38   | 6.09                 | *         |
| <i>Alox15</i>                                                            | 0.56       | 0.22     | 2619.73     | 328.79   | 11.89                | *         |
| <i>Ecm1</i>                                                              | 1.31       | 0.47     | 2101.98     | 318.96   | 10.52                | *         |
| <i>Thbs1</i>                                                             | 21.04      | 7.01     | 1964.95     | 256.03   | 6.54                 | *         |
| <i>Emilin2</i>                                                           | 2.24       | 0.55     | 1779.38     | 152.02   | 9.58                 | *         |
| <i>C4b</i>                                                               | 5.37       | 1        | 1414.73     | 235.47   | 8.04                 | *         |
| <i>Retnla</i>                                                            | 2.15       | 1.06     | 1282.59     | 177.11   | 8.8                  | *         |
| <i>Fabp4</i>                                                             | 0.53       | 0.1      | 1261.89     | 123.26   | 10.98                | *         |
| <i>F5</i>                                                                | 1.45       | 0.21     | 1150.07     | 150.86   | 9.56                 | *         |
| <i>Ednrb</i>                                                             | 2.07       | 0.72     | 1087.94     | 70.41    | 8.92                 | *         |
| <i>Icam2</i>                                                             | 4.78       | 0.89     | 1068.61     | 154.26   | 7.81                 | *         |
| <i>Fcna</i>                                                              | 2.36       | 0.24     | 977.21      | 174.83   | 8.66                 | *         |
| <i>Ahnak</i>                                                             | 9.47       | 1.64     | 888.6       | 47.24    | 6.52                 | *         |
| <i>Ptgis</i>                                                             | 2.34       | 0.61     | 850.46      | 58.21    | 8.52                 | *         |
| <i>Cxcl13</i>                                                            | 2.02       | 0.59     | 753.71      | 170.75   | 8.45                 | *         |
| <i>Serpnb2</i>                                                           | 0.42       | 0.2      | 735.95      | 110.57   | 10.4                 | *         |
| <i>Msr1</i>                                                              | 4.8        | 0.69     | 595.68      | 33.58    | 6.91                 | *         |
| Microglia Sensome Genes Expression in Macrophages: Figure 3a-b           |            |          |             |          |                      |           |
| Gene name                                                                | Microglia  | SD mic   | Macrophages | SD mac   | Log2 Fold Difference | P-value * |
| <i>P2ry12</i>                                                            | 3781.22153 | 326.7976 | 4.59994     | 0.84231  | 9.66                 | *         |
| <i>Tmem119</i>                                                           | 2753.65139 | 154.7322 | 12.08648    | 2.89043  | 7.84                 | *         |
| <i>Gpr34</i>                                                             | 1941.25889 | 154.8158 | 0.30624     | 0.13663  | 12.18                | *         |
| <i>Csf1r</i>                                                             | 1634.12256 | 127.3727 | 337.64869   | 36.02073 | 2.27                 | *         |
| <i>Cd53</i>                                                              | 1516.55585 | 94.30559 | 694.47938   | 30.99505 | 1.13                 | *         |
| <i>Siglech</i>                                                           | 1501.56608 | 124.5712 | 0.10358     | 0.13088  | 13.72                | *         |
| <i>Cx3cr1</i>                                                            | 1493.89763 | 87.69864 | 0.31728     | 0.18791  | 12.13                | *         |
| <i>Selplg</i>                                                            | 1446.82688 | 180.2317 | 609.51334   | 48.2013  | 1.25                 | *         |
| <i>Ly86</i>                                                              | 1073.53467 | 95.10496 | 187.18005   | 22.08544 | 2.52                 | *         |
| <i>Fcgr3</i>                                                             | 1004.49566 | 140.0445 | 713.85426   | 71.56888 | 0.49                 | *         |
| <i>Fcer1g</i>                                                            | 837.22603  | 91.5999  | 416.14125   | 70.85151 | 1.01                 | *         |
| <i>Tyrobp</i>                                                            | 831.81833  | 79.03173 | 544.60018   | 65.16578 | 0.61                 | *         |
| <i>Slco2b1</i>                                                           | 725.06274  | 41.71548 | 0.08113     | 0.07573  | 13.34                | *         |
| <i>Itgam</i>                                                             | 715.1316   | 70.03395 | 1918.49259  | 163.1004 | -1.42                | *         |
| <i>Tgfb1</i>                                                             | 661.87659  | 111.803  | 20.27528    | 3.10444  | 5.03                 | *         |
| <i>Slc2a5</i>                                                            | 636.66974  | 57.71076 | 0.60191     | 0.29032  | 9.99                 | *         |
| <i>P2ry13</i>                                                            | 614.12845  | 70.25941 | 0.41807     | 0.19726  | 10.47                | *         |
| <i>Ifngr1</i>                                                            | 610.46837  | 27.50385 | 100.45695   | 4.96574  | 2.6                  | *         |
| <i>Itgb5</i>                                                             | 592.76931  | 39.9607  | 0.73483     | 0.32688  | 9.59                 | *         |
| <i>Ccr5</i>                                                              | 568.59921  | 35.27909 | 68.11265    | 8.08345  | 3.06                 | *         |
| <i>Cd74</i>                                                              | 561.39507  | 138.8234 | 1134.61954  | 200.614  | 1.01                 | *         |
| <i>Emr1</i>                                                              | 495.03944  | 25.71118 | 1445.80143  | 176.5029 | 1.55                 | *         |
| <i>Cmtm6</i>                                                             | 451.56021  | 99.04759 | 82.58009    | 6.42645  | 2.45                 | *         |
| <i>Cd68</i>                                                              | 442.90079  | 90.94506 | 573.09707   | 90.44459 | 0.37                 | 0.005     |
| <i>Trem2</i>                                                             | 442.09     | 30.7     | 5           | 1.06     | 6.48                 | *         |
| <i>Fcgr2b</i>                                                            | 410.55     | 10.62    | 316.52      | 43.76    | 0.38                 | 0.003     |
| <i>Cd52</i>                                                              | 392.64     | 43.16    | 727.18      | 75.64    | 0.89                 | *         |
| <i>Itgb2</i>                                                             | 354.39     | 29.02    | 2081.23     | 177.78   | -2.58                | *         |
| <i>Gi24</i>                                                              | 351.84     | 47.19    | 168.9       | 19.65    | 1.06                 | *         |
| <i>Entpd1</i>                                                            | 291.66     | 18.28    | 58.45       | 5.22     | 2.32                 | *         |
| <i>Fcgr1</i>                                                             | 289.36     | 46.37    | 20.85       | 3.32     | 3.8                  | *         |
| <i>Cd180</i>                                                             | 248.03     | 33.78    | 94.78       | 15.45    | 1.39                 | *         |
| <i>Cmtm7</i>                                                             | 244.96     | 27.08    | 143.74      | 11.51    | 0.77                 | *         |
| <i>Lgals9</i>                                                            | 231.94     | 32.35    | 180.12      | 20.96    | 0.37                 | 0.004     |

| Microglia Sensome Genes Expression in Macrophages: Figure 3a-b (continued) |           |        |             |        |                      |           |
|----------------------------------------------------------------------------|-----------|--------|-------------|--------|----------------------|-----------|
| Gene name                                                                  | Microglia | SD mic | Macrophages | SD mac | Log2 Fold Difference | P-value * |
| <i>Tgfb2</i>                                                               | 223.96    | 34.43  | 85.17       | 5.39   | 1.39                 | *         |
| <i>Ectscr</i>                                                              | 223.88    | 15.07  | 0.11        | 0.09   | 10.65                | *         |
| <i>Tmem173</i>                                                             | 212.87    | 29.99  | 15.48       | 1.97   | 3.78                 | *         |
| <i>Tlr2</i>                                                                | 195.84    | 14.42  | 95.25       | 12.67  | 1.04                 | *         |
| <i>Lag3</i>                                                                | 191.56    | 39.56  | 0.03        | 0.05   | 12.16                | *         |
| <i>Ltf</i>                                                                 | 189.98    | 15.34  | 0.05        | 0.06   | 11.73                | *         |
| <i>P2ry6</i>                                                               | 189.12    | 15.26  | 8.22        | 0.83   | 4.52                 | *         |
| <i>Il10ra</i>                                                              | 187.15    | 3.3    | 59.36       | 7.37   | 1.66                 | *         |
| <i>Lair1</i>                                                               | 170.92    | 11.29  | 11.93       | 1.63   | 3.79                 | *         |
| <i>Gpr183</i>                                                              | 163.55    | 10.97  | 13.06       | 2.38   | 3.63                 | *         |
| <i>Tmem37</i>                                                              | 161.97    | 16.03  | 85.68       | 10.74  | 0.92                 | *         |
| <i>Cd37</i>                                                                | 158.79    | 21.69  | 222.03      | 22.59  | -0.48                | 0.0004    |
| <i>Cd86</i>                                                                | 155.07    | 6.44   | 27.48       | 1.65   | 2.49                 | *         |
| <i>Slamf9</i>                                                              | 139.72    | 12.24  | 7.29        | 1.02   | 4.27                 | *         |
| <i>Tlr7</i>                                                                | 133.53    | 8.94   | 68.78       | 5.49   | 0.96                 | *         |
| <i>Cd14</i>                                                                | 128.14    | 14.64  | 115.88      | 12.75  | 0.14                 | 0.25      |
| <i>Il6ra</i>                                                               | 112.16    | 10.66  | 54.49       | 7.8    | 1.04                 | *         |
| <i>Clec4a3</i>                                                             | 106.2     | 1.22   | 68.57       | 5.3    | 0.63                 | *         |
| <i>Ptprc</i>                                                               | 105.92    | 10.51  | 99.98       | 6.71   | 0.08                 | 0.5       |
| <i>Clec5a</i>                                                              | 103.31    | 10.29  | 14.33       | 1.28   | 2.85                 | *         |
| <i>Havcr2</i>                                                              | 102.79    | 7.88   | 0.07        | 0.11   | 10.52                | *         |
| <i>Upk1b</i>                                                               | 92.79     | 14.57  | 0.24        | 0.17   | 8.24                 | *         |
| <i>Adora3</i>                                                              | 92        | 5.96   | 1.31        | 0.44   | 6.13                 | *         |
| <i>Tnfrsf13b</i>                                                           | 91.9      | 9.67   | 35.23       | 3.08   | 1.38                 | *         |
| <i>Clec7a</i>                                                              | 90.46     | 13.78  | 187.07      | 38.49  | -1.05                | *         |
| <i>C3ar1</i>                                                               | 88.77     | 10.28  | 140.38      | 13.83  | -0.66                | *         |
| <i>Ptafr</i>                                                               | 86.33     | 10.6   | 25.47       | 4.72   | 1.76                 | *         |
| <i>Slc7a7</i>                                                              | 81.27     | 2.45   | 22.74       | 1.99   | 1.83                 | *         |
| <i>Gpr77</i>                                                               | 75.5      | 12.43  | 2.78        | 0.66   | 4.77                 | *         |
| <i>Cxcl16</i>                                                              | 73.65     | 9.26   | 48.95       | 4.26   | 0.58                 | *         |
| <i>C1orf162 homolog</i>                                                    | 65.38     | 4.75   | 19.1        | 3.46   | 1.78                 | *         |
| <i>Icam1</i>                                                               | 64.16     | 5.66   | 11.89       | 2.24   | 2.44                 | *         |
| <i>Icam4</i>                                                               | 64.12     | 5.7    | 11.82       | 2.25   | 2.44                 | *         |
| <i>Cmklr1</i>                                                              | 62.11     | 3.69   | 158.81      | 11.39  | -1.35                | *         |
| <i>Cd33</i>                                                                | 56.56     | 0.66   | 14.17       | 1.89   | 1.99                 | *         |
| <i>Cd48</i>                                                                | 54.03     | 3.1    | 38.08       | 2.92   | 0.5                  | 0.0002    |
| <i>Clec4a2</i>                                                             | 50.24     | 3.01   | 5.07        | 0.64   | 3.27                 | *         |
| <i>Fcrl1</i>                                                               | 48.69     | 3.01   | 1.49        | 0.45   | 5.04                 | *         |
| <i>Gpr84</i>                                                               | 47.84     | 4.75   | 0.29        | 0.14   | 7.41                 | *         |
| <i>Tlr4</i>                                                                | 47.67     | 4.89   | 30.33       | 2.55   | 0.64                 | *         |
| <i>Il21r</i>                                                               | 46.72     | 7.41   | 2.22        | 0.5    | 4.38                 | *         |
| <i>Slc16a3</i>                                                             | 46.64     | 5.06   | 51.61       | 10.3   | -0.15                | 0.31      |
| <i>Tnfrsf17</i>                                                            | 45.69     | 3.74   | 0.29        | 0.2    | 7.21                 | *         |
| <i>Ifitm6</i>                                                              | 34.99     | 0.76   | 331.84      | 17.89  | -3.26                | *         |
| <i>Lpar5</i>                                                               | 32.94     | 1.77   | 79.88       | 9.06   | -1.27                | *         |
| <i>Ccr12</i>                                                               | 31.85     | 8.92   | 4.85        | 0.61   | 2.7                  | *         |
| <i>Gpr160</i>                                                              | 31.63     | 4.38   | 7.79        | 1.09   | 2                    | *         |
| <i>Tlr12</i>                                                               | 31.52     | 1.47   | 0.06        | 0.09   | 8.82                 | *         |
| <i>Clec4b1</i>                                                             | 30.61     | 0.68   | 3.4         | 0.55   | 3.17                 | *         |
| <i>Pilra</i>                                                               | 30.53     | 2.05   | 286.31      | 13.14  | -3.24                | *         |
| <i>Cyslr1</i>                                                              | 30.19     | 1.2    | 16.69       | 2.89   | 0.85                 | *         |
| <i>C5ar1</i>                                                               | 29.55     | 2.39   | 69.36       | 10.24  | -1.24                | *         |
| <i>Cd84</i>                                                                | 29.11     | 0.87   | 19.29       | 2.93   | -0.02                | 0.93      |
| <i>Lilra5</i>                                                              | 28.54     | 2.4    | 0.77        | 0.19   | 5.22                 | *         |
| <i>Tnfrsf1b</i>                                                            | 27.07     | 1.45   | 16.46       | 2.02   | 0.73                 | *         |
| <i>Tlr1</i>                                                                | 26.25     | 2.36   | 6.29        | 0.93   | 2.06                 | *         |
| <i>Tlr6</i>                                                                | 22.71     | 0.53   | 14.03       | 1.71   | 0.69                 | *         |
| <i>Fcgr4</i>                                                               | 21.44     | 1.41   | 86.25       | 15.16  | -1.97                | *         |
| <i>Siglec5</i>                                                             | 20.49     | 1.1    | 0.33        | 0.13   | 5.88                 | *         |
| <i>Cd79b</i>                                                               | 20.32     | 1.44   | 39.31       | 4.8    | -0.95                | *         |
| <i>P2Y G</i>                                                               | 19.1      | 1.36   | 15.37       | 0.95   | 0.31                 | 0.037     |
| <i>Tmem8c</i>                                                              | 14.7      | 2.05   | 0.02        | 0.06   | 9.05                 | *         |
| <i>Cd22</i>                                                                | 12.8      | 1.82   | 7.27        | 1.51   | 0.83                 | *         |
| <i>Csf2rb2</i>                                                             | 10.79     | 1.84   | 8.6         | 1.18   | 0.34                 | 0.036     |
| <i>Tlr13</i>                                                               | 10.77     | 1.05   | 9.91        | 1.31   | 0.09                 | 0.53      |
| <i>Cd101</i>                                                               | 10.72     | 0.76   | 0.14        | 0.1    | 6.27                 | *         |
| Comparison of Gene Families in Microglia and Macrophages: Figure 3c-j      |           |        |             |        |                      |           |
| PURINORECEPTORS: P2X AND P2Y FAMILIES                                      |           |        |             |        |                      |           |
| Gene name                                                                  | Microglia | SD mic | Macrophages | SD mac | Log2 Fold Difference | P-value   |
| <i>P2rX7</i>                                                               | 34.37     | 1.89   | 9.12        | 1.15   | 1.9                  | *         |
| <i>P2rX4</i>                                                               | 32.96     | 2.75   | 58.39       | 7.71   | -0.83                | *         |
| <i>P2rX1</i>                                                               | 4.14      | 0.96   | 14.56       | 1.62   | -1.78                | *         |
| <i>P2rX7b</i>                                                              | 2.86      | 0.34   | 0.31        | 0.18   | 3.22                 | *         |
| <i>P2rX6</i>                                                               | 0.49      | 0.29   | 0.07        | 0.09   | 2.96                 | *         |
| <i>P2rX3</i>                                                               | 0.15      | 0.02   | 0.11        | 0.09   | 0.32                 | 0.75      |
| <i>P2rX5</i>                                                               | 0         | 0      | 0.04        | 0.06   | -25.51               | 1         |
| <i>P2rX7d</i>                                                              | 0.1       | 0.08   | 0.06        | 0.07   | 1.07                 | 0.38      |
| <i>P2rX2</i>                                                               | 0.1       | 0.14   | 0.03        | 0.07   | 0.91                 | 0.64      |
| <i>P2ry12</i>                                                              | 3781.22   | 326.8  | 4.6         | 0.84   | 9.66                 | *         |
| <i>P2ry13</i>                                                              | 614.13    | 70.26  | 0.42        | 0.2    | 10.47                | *         |
| <i>P2ry6</i>                                                               | 189.12    | 15.26  | 8.22        | 0.83   | 4.52                 | *         |
| <i>P2ry14</i>                                                              | 1.09      | 0.27   | 11.74       | 1.93   | -3.42                | *         |
| <i>P2ry10</i>                                                              | 0.67      | 0.03   | 1.98        | 0.36   | -1.42                | *         |
| <i>P2ry2</i>                                                               | 0.6       | 0.27   | 18.77       | 3.25   | -5.08                | *         |
| <i>P2ry1</i>                                                               | 0.31      | 0.19   | 3.88        | 0.91   | -3.49                | *         |
| <i>P2ry4</i>                                                               | 0.22      | 0.08   | 0.36        | 0.19   | -0.52                | 0.34      |
| CHEMOKINE RECEPTORS                                                        |           |        |             |        |                      |           |
| <i>Ccr5</i>                                                                | 568.6     | 35.28  | 68.11       | 8.08   | 3.06                 | *         |
| <i>Ccr1</i>                                                                | 20.97     | 3.66   | 227.47      | 8.07   | -3.45                | *         |
| <i>Ccr2</i>                                                                | 6.85      | 0.96   | 33.81       | 5.75   | -2.29                | *         |

| Comparison of Gene Families in Microglia and Macrophages: Figure 3c-j (continued)                                                                                 |         |        |         |        |        |        |
|-------------------------------------------------------------------------------------------------------------------------------------------------------------------|---------|--------|---------|--------|--------|--------|
| CHEMOKINE RECEPTORS (continued)                                                                                                                                   |         |        |         |        |        |        |
| <i>Ccr3</i>                                                                                                                                                       | 1.38    | 0.29   | 0.84    | 0.35   | 0.7    | 0.048  |
| <i>Ccr4</i>                                                                                                                                                       | 0.23    | 0.12   | 0.04    | 0.05   | 1.97   | 0.015  |
| <i>Ccr6</i>                                                                                                                                                       | 0.91    | 0.36   | 0.43    | 0.22   | 1.12   | 0.003  |
| <i>Ccr7</i>                                                                                                                                                       | 0.12    | 0.09   | 0.67    | 0.34   | -2.45  | 0.004  |
| <i>Ccr8</i>                                                                                                                                                       | 0       | 0      | 0.05    | 0.08   | -1.1   | 1      |
| <i>Ccr9</i>                                                                                                                                                       | 0.07    | 0.08   | 0.3     | 0.25   | -0.98  | 0.18   |
| <i>Ccr10</i>                                                                                                                                                      | 0.1     | 0.08   | 0.15    | 0.14   | -0.26  | 1      |
| <i>Cx3cr1</i>                                                                                                                                                     | 1493.9  | 87.7   | 0.32    | 0.19   | 12.13  | *      |
| <i>Cxcr4</i>                                                                                                                                                      | 12.3    | 0.07   | 4.77    | 2.21   | 1.34   | *      |
| <i>Cxcr1</i>                                                                                                                                                      | 0.18    | 0.08   | 0.13    | 0.11   | 0.35   | 0.78   |
| <i>Cxcr2</i>                                                                                                                                                      | 3.21    | 1.51   | 0.16    | 0.16   | 4.33   | *      |
| <i>Cxcr3</i>                                                                                                                                                      | 2.17    | 0.32   | 0.3     | 0.12   | 2.91   | *      |
| <i>Cxcr5</i>                                                                                                                                                      | 0.19    | 0.16   | 3.09    | 0.74   | -4     | *      |
| <i>Cxcr6</i>                                                                                                                                                      | 0.28    | 0.13   | 0.16    | 0.15   | 0.6    | 0.31   |
| <i>Cxcr7</i>                                                                                                                                                      | 1.84    | 0.3    | 12.98   | 2.2    | -2.77  | *      |
| Fc RECEPTORS                                                                                                                                                      |         |        |         |        |        |        |
| <i>Fcgr3</i>                                                                                                                                                      | 1004.5  | 140.04 | 713.85  | 71.57  | 0.49   | *      |
| <i>Fcgr2b</i>                                                                                                                                                     | 410.55  | 10.62  | 316.52  | 43.76  | 0.38   | 0.003  |
| <i>Fcgr1</i>                                                                                                                                                      | 289.36  | 46.37  | 20.85   | 3.32   | 3.8    | *      |
| <i>Fcgrt</i>                                                                                                                                                      | 44.55   | 2.85   | 62.88   | 5.42   | -0.5   | 0.0004 |
| <i>Fcgr4</i>                                                                                                                                                      | 21.44   | 1.41   | 86.25   | 15.16  | -1.97  | *      |
| <i>Fcer1g</i>                                                                                                                                                     | 837.23  | 91.6   | 416.14  | 70.85  | 1.01   | *      |
| <i>Fcer1a</i>                                                                                                                                                     | 0.67    | 0.24   | 0.59    | 0.26   | 0.3    | 0.48   |
| <i>Fcr1</i>                                                                                                                                                       | 48.69   | 3.01   | 1.49    | 0.45   | 5.04   | *      |
| <i>Fcrl6</i>                                                                                                                                                      | 0.22    | 0.09   | 0.32    | 0.18   | -0.77  | 0.53   |
| IFITMS                                                                                                                                                            |         |        |         |        |        |        |
| <i>Ifitm3</i>                                                                                                                                                     | 60.94   | 4.07   | 1218.97 | 101.42 | -4.32  | *      |
| <i>Ifitm6</i>                                                                                                                                                     | 34.99   | 0.76   | 331.84  | 17.89  | -3.26  | *      |
| <i>Ifitm2</i>                                                                                                                                                     | 10.53   | 1.17   | 291.94  | 34.17  | -4.75  | *      |
| <i>Ifitm1</i>                                                                                                                                                     | 5.04    | 0.37   | 0.62    | 0.27   | 2.93   | *      |
| <i>Ifitm7</i>                                                                                                                                                     | 0.23    | 0.17   | 0.13    | 0.11   | 0.72   | 0.2    |
| <i>Ifitm5</i>                                                                                                                                                     | 0       | 0      | 0.14    | 0.21   | -27.1  | 0.08   |
| TOLL-LIKE RECEPTORS                                                                                                                                               |         |        |         |        |        |        |
| <i>Tlr2</i>                                                                                                                                                       | 195.84  | 14.42  | 95.25   | 12.67  | 1.04   | *      |
| <i>Tlr7</i>                                                                                                                                                       | 133.53  | 8.94   | 68.78   | 5.49   | 0.96   | *      |
| <i>Tlr4</i>                                                                                                                                                       | 47.67   | 4.89   | 30.33   | 2.55   | 0.64   | *      |
| <i>Tlr3</i>                                                                                                                                                       | 39.42   | 4.27   | 7.84    | 1.02   | 2.34   | *      |
| <i>Tlr1</i>                                                                                                                                                       | 26.25   | 2.36   | 6.29    | 0.93   | 2.06   | *      |
| <i>Tlr6</i>                                                                                                                                                       | 22.71   | 0.53   | 14.03   | 1.71   | 0.69   | *      |
| <i>Tlr13</i>                                                                                                                                                      | 10.77   | 1.05   | 9.91    | 1.31   | 0.09   | 0.53   |
| <i>Tlr9</i>                                                                                                                                                       | 8.63    | 0.92   | 0.31    | 0.14   | 4.68   | *      |
| <i>Tlr8</i>                                                                                                                                                       | 3.57    | 0.7    | 35.74   | 5.65   | -3.35  | *      |
| <i>Tlr11</i>                                                                                                                                                      | 0.2     | 0.16   | 0.3     | 0.14   | -0.45  | 0.52   |
| <i>Tlr12</i>                                                                                                                                                      | 31.52   | 1.47   | 0.06    | 0.09   | 8.82   | *      |
| <i>Tlr5</i>                                                                                                                                                       | 5.04    | 0.79   | 0.3     | 0.21   | 4.18   | *      |
| SIGLECS                                                                                                                                                           |         |        |         |        |        |        |
| <i>Siglech</i>                                                                                                                                                    | 1501.57 | 124.57 | 0.1     | 0.13   | 13.72  | *      |
| <i>Siglece</i>                                                                                                                                                    | 17.11   | 1.18   | 3.6     | 0.75   | 2.27   | *      |
| <i>Siglecg</i>                                                                                                                                                    | 1.82    | 0.1    | 2.27    | 0.48   | -0.28  | 0.33   |
| <i>Siglec3/CD33</i>                                                                                                                                               | 56.56   | 0.66   | 14.17   | 1.89   | 1.99   | *      |
| <i>Siglec5</i>                                                                                                                                                    | 20.49   | 1.1    | 0.33    | 0.13   | 5.88   | *      |
| <i>Siglec1</i>                                                                                                                                                    | 1.14    | 0.24   | 4.97    | 0.59   | -2.17  | *      |
| <i>Siglec15</i>                                                                                                                                                   | 0       | 0      | 0.01    | 0.02   | -23.93 | 1      |
| *Unless otherwise indicated, all p values for comparison between microglia vs macrophages for the above transcripts were <math><10^{-5}</math> by EdgeR analysis. |         |        |         |        |        |        |

| <b>Supplementary Table 3: Young vs Old Microglia</b>            |                      |            |                    |          |        |          |
|-----------------------------------------------------------------|----------------------|------------|--------------------|----------|--------|----------|
| <b>Alternative Priming Genes Old/Young Microglia: Figure 7a</b> |                      |            |                    |          |        |          |
| Gene names                                                      | Mean Young Microglia | STDV Young | Mean Old Microglia | STDV Old | log FC | p-value* |
| <i>Clec7a</i>                                                   | 90.46                | 13.78      | 363.73             | 29.41    | 2.01   | *        |
| <i>Chi3l3</i>                                                   | 70.74                | 16.63      | 329.5              | 43.13    | 2.22   | *        |
| <i>Spp1</i>                                                     | 9.08                 | 1.37       | 194.04             | 11.29    | 4.39   | *        |
| <i>Lgals3</i>                                                   | 21.22                | 3.03       | 115.04             | 7.74     | 2.44   | *        |
| <i>Cd302</i>                                                    | 186.16               | 9.83       | 103.29             | 6.63     | -0.85  | *        |
| <i>F13a1</i>                                                    | 24.92                | 3.73       | 102.2              | 46.24    | 2.04   | *        |
| <i>Fgl2</i>                                                     | 28.74                | 1.52       | 69.48              | 7.2      | 1.27   | *        |
| <i>Cxcr4</i>                                                    | 12.3                 | 0.07       | 61.84              | 4.48     | 2.32   | *        |
| <i>Mrc1</i>                                                     | 43.29                | 5.61       | 58.68              | 20.17    | 0.45   | 0.012    |
| <i>Lta4h</i>                                                    | 33.61                | 2.51       | 46.84              | 4.17     | 0.48   | 0.008    |
| <i>Ccl8</i>                                                     | 9.81                 | 1.82       | 39.94              | 30.42    | 2.03   | *        |
| <i>Cxcl2</i>                                                    | 10.97                | 0.83       | 39.6               | 11.53    | 1.83   | *        |
| <i>Il21r</i>                                                    | 46.72                | 7.41       | 37.77              | 1.65     | -0.3   | 0.01     |
| <i>Il10</i>                                                     | 27.72                | 1.26       | 31.13              | 1.59     | 0.15   | 0.36     |
| <i>Tgfb1</i>                                                    | 12.78                | 0.65       | 24.65              | 1.28     | 0.93   | *        |
| <i>Tlr1</i>                                                     | 26.25                | 2.36       | 22.42              | 1.75     | -0.23  | 0.23     |
| <i>Msr1</i>                                                     | 4.8                  | 0.69       | 13.77              | 9.2      | 1.53   | *        |
| <i>Cd163</i>                                                    | 3.7                  | 0.54       | 13.61              | 8.78     | 1.86   | *        |
| <i>Car2</i>                                                     | 10.02                | 2.01       | 13.56              | 1.49     | 0.4    | 0.06     |
| <i>Tgfb1</i>                                                    | 27.26                | 5.61       | 13.06              | 1.61     | -1.07  | *        |
| <i>Egr2</i>                                                     | 4.11                 | 2.25       | 11.51              | 2.38     | 1.45   | *        |
| <i>Mmp12</i>                                                    | 1.33                 | 0.2        | 10.18              | 0.81     | 2.95   | *        |
| <i>Marco</i>                                                    | 0.09                 | 0.06       | 8.09               | 11.43    | 6.25   | *        |
| <i>Retnla</i>                                                   | 2.15                 | 1.06       | 7.94               | 2.98     | 2.18   | *        |
| <i>Tlr8</i>                                                     | 3.57                 | 0.7        | 7.7                | 1.7      | 1.17   | *        |
| <i>Arg1</i>                                                     | 0.35                 | 0.04       | 6.6                | 9.27     | 3.87   | *        |
| <i>Gas7</i>                                                     | 0.81                 | 0.16       | 6.41               | 1.91     | 2.95   | *        |
| <i>Il1rn</i>                                                    | 0.99                 | 0.3        | 6.4                | 0.98     | 2.7    | *        |
| <i>Alox15</i>                                                   | 0.56                 | 0.22       | 6.22               | 5.41     | 3.28   | *        |
| <i>Adk</i>                                                      | 4.56                 | 0.29       | 5.82               | 0.7      | 0.39   | 0.14     |
| <i>Igf1</i>                                                     | 1.59                 | 0.36       | 3.3                | 0.5      | 0.97   | 0.005    |
| <i>Cxcl1</i>                                                    | 0.47                 | 0.07       | 0.89               | 0.49     | 0.98   | 0.1      |
| <i>Cxcl3</i>                                                    | 0.26                 | 0.06       | 0.49               | 0.38     | 0.61   | 0.5      |
| <i>Cd209e</i>                                                   | 0.24                 | 0.09       | 0.45               | 0.18     | 0.97   | 0.31     |
| <i>Ccl26</i>                                                    | 0.09                 | 0.13       | 0.4                | 0.34     | 1.79   | 0.12     |
| <i>Ccl17</i>                                                    | 0.59                 | 0.25       | 0.39               | 0.31     | -0.33  | 0.52     |
| <i>Ccl20</i>                                                    | 0.05                 | 0.07       | 0.23               | 0.18     | 3.1    | 0.07     |
| <b>Classical Priming Genes Old/Young Microglia: Figure 7b</b>   |                      |            |                    |          |        |          |
| <i>Tnf</i>                                                      | 16.61                | 4.91       | 104.96             | 56.42    | 2.63   | *        |
| <i>Bcl2a1a</i>                                                  | 101.09               | 9.38       | 99.63              | 8        | -0.03  | 0.88     |
| <i>Cxcl10</i>                                                   | 8.37                 | 1.62       | 35.98              | 12.62    | 2.06   | *        |
| <i>Xiap</i>                                                     | 40.42                | 9.81       | 33.11              | 5.91     | -0.28  | 0.13     |
| <i>Nampt</i>                                                    | 19.64                | 1.61       | 26.77              | 2.72     | 0.46   | 0.017    |
| <i>Tymp</i>                                                     | 31.28                | 5.45       | 19.15              | 1.41     | -0.7   | 0.0003   |
| <i>Birc3</i>                                                    | 12.18                | 1.63       | 17.56              | 1.15     | 0.55   | 0.008    |
| <i>Il15</i>                                                     | 17.92                | 1.39       | 12.15              | 0.94     | -0.55  | 0.008    |
| <i>Gadd45gip1</i>                                               | 41.12                | 7.04       | 23.29              | 1.81     | -0.82  | *        |
| <i>Cxcl9</i>                                                    | 3.93                 | 1.03       | 7.81               | 4.3      | 1.05   | 0.00009  |
| <i>Tnfsf10</i>                                                  | 4.73                 | 1.03       | 5.87               | 0.45     | 0.29   | 0.28     |
| <i>Il6</i>                                                      | 5.34                 | 0.63       | 4.49               | 2.54     | -0.31  | 0.31     |
| <i>Pycard</i>                                                   | 355.48               | 16.52      | 182.13             | 4.75     | -0.96  | *        |
| <i>Naip5</i>                                                    | 5.44                 | 0.57       | 8.25               | 2.06     | 0.66   | 0.008    |
| <i>Nlrp1b</i>                                                   | 0.6                  | 0.28       | 0.33               | 0.23     | -0.82  | 0.37     |
| <i>Nlrp1a</i>                                                   | 0.11                 | 0.14       | 0.06               | 0.03     | 1.76   | 0.19     |
| <i>Nlrp3</i>                                                    | 24.18                | 7.6        | 18.38              | 3.94     | -0.4   | 0.04     |
| <i>Casp1</i>                                                    | 11.49                | 1.66       | 11.1               | 2.28     | -0.01  | 0.98     |
| <i>Aim2</i>                                                     | 31.7                 | 0.49       | 30.43              | 1.89     | -0.06  | 0.75     |
| <i>Nlrc4</i>                                                    | 0.49                 | 0.1        | 0.74               | 0.28     | 0.88   | 0.14     |
| <i>Ifny</i>                                                     | 0.19                 | 0.17       | 0.21               | 0.03     | -0.44  | 1        |
| <i>Il12a</i>                                                    | 0.14                 | 0.11       | 0.24               | 0.13     | 1.19   | 0.73     |
| <i>Il12b</i>                                                    | 0.18                 | 0.13       | 0.59               | 0.08     | 1.36   | 0.084    |
| <i>Il18</i>                                                     | 31.4                 | 1.21       | 20.36              | 0.67     | -0.63  | 0.0011   |
| <i>Il1b</i>                                                     | 17.72                | 2.36       | 51.61              | 15.19    | 1.49   | *        |
| <i>Il33</i>                                                     | 0.92                 | 0.25       | 0.93               | 0.39     | -0.15  | 0.88     |
| <i>Irak1</i>                                                    | 24.25                | 1.26       | 25.28              | 1.99     | 0.07   | 0.71     |
| <i>Irf1</i>                                                     | 21.5                 | 0.29       | 22.03              | 0.87     | 0.04   | 0.84     |
| <i>Myd88</i>                                                    | 37.99                | 2.46       | 33.13              | 2.23     | -0.2   | 0.28     |
| <i>Panx1</i>                                                    | 7.1                  | 1.04       | 6.9                | 0.29     | -0.04  | 0.93     |
| <i>Ptgs2</i>                                                    | 6.35                 | 2.53       | 41.86              | 17.22    | 2.67   | *        |
| <i>Stk30</i>                                                    | 0.32                 | 0.13       | 0.61               | 0.59     | 0.62   | 0.35     |
| <i>Ripk2</i>                                                    | 13.19                | 0.94       | 18.15              | 3.02     | 0.47   | 0.025    |
| <i>Txnip</i>                                                    | 227.06               | 44.09      | 168.45             | 16.23    | -0.42  | 0.012    |
| <b>Microglial Sensome Old vs Young: Figure 8a</b>               |                      |            |                    |          |        |          |
| <i>Ecsr</i>                                                     | 223.88               | 15.07      | 89.42              | 10.83    | -1.32  | *        |
| <i>Trem2</i>                                                    | 442.09               | 30.7       | 183.71             | 8.62     | -1.26  | *        |
| <i>Tnfrsf17</i>                                                 | 45.69                | 3.74       | 22.56              | 1.48     | -1.02  | *        |
| <i>Tmem37</i>                                                   | 161.97               | 16.03      | 82.1               | 3.56     | -0.98  | *        |
| <i>Gpr34</i>                                                    | 1941.26              | 154.82     | 1092.41            | 6.89     | -0.83  | *        |
| <i>P2ry12</i>                                                   | 3781.22              | 326.8      | 2131.2             | 76.38    | -0.83  | *        |
| <i>P2ry13</i>                                                   | 614.13               | 70.26      | 346.84             | 7.74     | -0.82  | *        |
| <i>Gpr183</i>                                                   | 163.55               | 10.97      | 96.99              | 5.41     | -0.75  | *        |
| <i>Fcrl1</i>                                                    | 48.69                | 3.01       | 29.67              | 3.47     | -0.71  | 0.00009  |
| <i>Tyrobp</i>                                                   | 831.82               | 79.03      | 521.65             | 16.63    | -0.67  | 0.00005  |
| <i>Cmtm7</i>                                                    | 244.96               | 27.08      | 155.56             | 7.68     | -0.65  | 0.0001   |
| <i>Cd79b</i>                                                    | 20.32                | 1.44       | 13.05              | 1.48     | -0.65  | 0.002    |
| <i>Adora3</i>                                                   | 92                   | 5.96       | 59.66              | 4.39     | -0.62  | 0.0004   |
| <i>Ifngr1</i>                                                   | 610.47               | 27.5       | 403.69             | 15.87    | -0.6   | 0.0003   |
| <i>Cxcl16</i>                                                   | 73.65                | 9.26       | 49.12              | 3.23     | -0.59  | 0.0009   |
| <i>Fcgr1</i>                                                    | 289.36               | 46.37      | 192.82             | 8.46     | -0.59  | 0.0005   |
| <i>Ccr5</i>                                                     | 568.6                | 35.28      | 382.15             | 6.4      | -0.57  | 0.0006   |
| <i>Slc2a5</i>                                                   | 636.67               | 57.71      | 428.4              | 22.17    | -0.57  | 0.0006   |

| Microglial Sensome Old vs Young: Figure 8a (continued) |                      |            |                    |          |        |          |
|--------------------------------------------------------|----------------------|------------|--------------------|----------|--------|----------|
| Gene names                                             | Mean Young Microglia | STDV Young | Mean Old Microglia | STDV Old | log FC | p-value* |
| <i>P2Y G-protein coupled</i>                           | 19.1                 | 1.36       | 12.76              | 1.64     | -0.56  | 0.006    |
| <i>Cd53</i>                                            | 1516.56              | 94.31      | 1061.66            | 20.28    | -0.51  | 0.002    |
| <i>Siglech</i>                                         | 1501.57              | 124.57     | 1067.68            | 51.79    | -0.49  | 0.003    |
| <i>Cd86</i>                                            | 155.07               | 6.44       | 110.81             | 3.1      | -0.48  | 0.005    |
| <i>Emr1</i>                                            | 495.04               | 25.71      | 355.93             | 15.23    | -0.47  | 0.004    |
| <i>Slco2b1</i>                                         | 725.06               | 41.72      | 522.58             | 13.27    | -0.47  | 0.004    |
| <i>Fcgr3</i>                                           | 1004.5               | 140.04     | 730.62             | 21.87    | -0.46  | 0.005    |
| <i>Tlr6</i>                                            | 22.71                | 0.53       | 17.02              | 1.86     | -0.43  | 0.034    |
| <i>Ptafr</i>                                           | 86.33                | 10.6       | 66.03              | 3.11     | -0.39  | 0.026    |
| <i>Gpr160</i>                                          | 31.63                | 4.38       | 24.28              | 3.42     | -0.37  | 0.047    |
| <i>Cysl1r1</i>                                         | 30.19                | 1.2        | 23.08              | 2.35     | -0.37  | 0.049    |
| <i>Lilra5</i>                                          | 28.54                | 2.4        | 22.54              | 1.9      | -0.35  | 0.071    |
| <i>Tmem173</i>                                         | 212.87               | 29.99      | 166.94             | 4.35     | -0.34  | 0.043    |
| <i>C1orf162 homolog</i>                                | 65.38                | 4.75       | 51.62              | 4.58     | -0.33  | 0.057    |
| <i>Lag3</i>                                            | 191.56               | 39.56      | 153.72             | 27       | -0.32  | 0.057    |
| <i>Cmtm6</i>                                           | 451.56               | 99.05      | 365.66             | 21.6     | -0.3   | 0.067    |
| <i>Tmem119</i>                                         | 2753.65              | 154.73     | 2239.9             | 98.02    | -0.3   | 0.071    |
| <i>Gpr77</i>                                           | 75.5                 | 12.43      | 61.38              | 8.09     | -0.3   | 0.088    |
| <i>Il21r</i>                                           | 46.72                | 7.41       | 37.77              | 1.65     | -0.3   | 0.098    |
| <i>Lair1</i>                                           | 170.92               | 11.29      | 137.88             | 3.92     | -0.29  | 0.084    |
| <i>Tnfrsf1b</i>                                        | 27.07                | 1.45       | 22.22              | 1.23     | -0.28  | 0.144    |
| <i>Clec4a2</i>                                         | 50.24                | 3.01       | 40.38              | 1.27     | -0.27  | 0.11     |
| <i>Itgam</i>                                           | 715.13               | 70.03      | 595.78             | 56.33    | -0.26  | 0.11     |
| <i>Ly86</i>                                            | 1073.53              | 95.1       | 898.04             | 18.31    | -0.26  | 0.12     |
| <i>Tlr4</i>                                            | 47.67                | 4.89       | 40.42              | 4.91     | -0.23  | 0.19     |
| <i>Cd48</i>                                            | 54.03                | 3.1        | 45.87              | 5.78     | -0.23  | 0.19     |
| <i>Clec4b1</i>                                         | 30.61                | 0.68       | 26.09              | 1.27     | -0.23  | 0.19     |
| <i>Tgfb1</i>                                           | 661.88               | 111.8      | 565.47             | 39.51    | -0.23  | 0.17     |
| <i>Tlr1</i>                                            | 26.25                | 2.36       | 22.42              | 1.75     | -0.23  | 0.23     |
| <i>Slc7a7</i>                                          | 81.27                | 2.45       | 71.16              | 5.01     | -0.19  | 0.28     |
| <i>Itgb5</i>                                           | 592.77               | 39.96      | 523.64             | 14.61    | -0.18  | 0.28     |
| <i>Csf1r</i>                                           | 1634.12              | 127.37     | 1446.93            | 91.48    | -0.18  | 0.29     |
| <i>Fcer1g</i>                                          | 837.23               | 91.6       | 760.22             | 70.34    | -0.14  | 0.41     |
| <i>Cd14</i>                                            | 128.14               | 14.64      | 116.5              | 13.22    | -0.14  | 0.42     |
| <i>Cd33</i>                                            | 56.56                | 0.66       | 51.74              | 2.18     | -0.12  | 0.5      |
| <i>Il10ra</i>                                          | 187.15               | 3.3        | 172.08             | 13.76    | -0.12  | 0.48     |
| <i>Cd180</i>                                           | 248.03               | 33.78      | 230.59             | 22.44    | -0.11  | 0.53     |
| <i>Entpd1</i>                                          | 291.66               | 18.28      | 272.73             | 13.65    | -0.1   | 0.567    |
| <i>Il6ra</i>                                           | 112.16               | 10.66      | 105.93             | 12.93    | -0.08  | 0.63     |
| <i>Cd101</i>                                           | 10.72                | 0.76       | 10.14              | 0.55     | -0.08  | 0.718    |
| <i>Upk1b</i>                                           | 92.79                | 14.57      | 89.77              | 2.58     | -0.05  | 0.8      |
| <i>Clec5a</i>                                          | 103.31               | 10.29      | 100.24             | 8.13     | -0.04  | 0.81     |
| <i>Gi24 isoform 2</i>                                  | 351.84               | 47.19      | 347.28             | 18.27    | -0.02  | 0.91     |
| <i>Cmklr1</i>                                          | 62.11                | 3.69       | 61.36              | 4.92     | -0.02  | 0.94     |
| <i>Gpr84</i>                                           | 47.84                | 4.75       | 47.51              | 8.66     | -0.01  | 0.96     |
| <i>Tlr7</i>                                            | 133.53               | 8.94       | 133.56             | 1.86     | 0      | 1        |
| <i>Cd84</i>                                            | 29.11                | 0.87       | 24.79              | 0.51     | 0.01   | 0.96     |
| <i>Icam4</i>                                           | 64.12                | 5.7        | 65.31              | 6.93     | 0.03   | 0.89     |
| <i>Tgfb2</i>                                           | 223.96               | 34.43      | 228.01             | 23.78    | 0.03   | 0.88     |
| <i>Icam1</i>                                           | 64.16                | 5.66       | 65.42              | 7        | 0.03   | 0.87     |
| <i>Selplg</i>                                          | 1446.83              | 180.23     | 1478.04            | 78.83    | 0.03   | 0.85     |
| <i>Havcr2</i>                                          | 102.79               | 7.88       | 106.77             | 6.17     | 0.05   | 0.76     |
| <i>Cd68</i>                                            | 442.9                | 90.95      | 466.69             | 48.59    | 0.08   | 0.65     |
| <i>Lgals9</i>                                          | 231.94               | 32.35      | 244.76             | 14.56    | 0.08   | 0.64     |
| <i>Cd37</i>                                            | 158.79               | 21.69      | 168.23             | 13.09    | 0.08   | 0.63     |
| <i>Fcgr2b</i>                                          | 410.55               | 10.62      | 434.09             | 34.62    | 0.08   | 0.62     |
| <i>Tlr13</i>                                           | 10.77                | 1.05       | 11.57              | 1.35     | 0.09   | 0.69     |
| <i>Clec4a3</i>                                         | 106.2                | 1.22       | 113.44             | 10.64    | 0.1    | 0.56     |
| <i>Tnfrsf13b</i>                                       | 91.9                 | 9.67       | 98.31              | 9.99     | 0.1    | 0.56     |
| <i>Cx3cr1</i>                                          | 1493.9               | 87.7       | 1608.4             | 29.84    | 0.11   | 0.52     |
| <i>Slamf9</i>                                          | 139.72               | 12.24      | 152.01             | 3.23     | 0.12   | 0.48     |
| <i>Itgb2</i>                                           | 354.39               | 29.02      | 389.14             | 19.08    | 0.14   | 0.38     |
| <i>P2ry6</i>                                           | 189.12               | 15.26      | 213.22             | 11.53    | 0.18   | 0.29     |
| <i>Lpar5</i>                                           | 32.94                | 1.77       | 36.96              | 2.83     | 0.18   | 0.32     |
| <i>Tlr12</i>                                           | 31.52                | 1.47       | 37.52              | 3.21     | 0.25   | 0.18     |
| <i>Csf2rb2</i>                                         | 10.79                | 1.84       | 13.28              | 2.44     | 0.29   | 0.17     |
| <i>Siglec5</i>                                         | 20.49                | 1.1        | 25.79              | 1.25     | 0.32   | 0.09     |
| <i>Ptprc</i>                                           | 105.92               | 10.51      | 132.54             | 16.5     | 0.33   | 0.06     |
| <i>Tmem8c</i>                                          | 14.7                 | 2.05       | 19.8               | 1.02     | 0.42   | 0.03     |
| <i>C3ar1</i>                                           | 88.77                | 10.28      | 121.97             | 12.74    | 0.46   | 0.007    |
| <i>Slc16a3</i>                                         | 46.64                | 5.06       | 68.51              | 8.57     | 0.56   | 0.0016   |
| <i>Tlr2</i>                                            | 195.84               | 14.42      | 291.48             | 6.63     | 0.57   | 0.0006   |
| <i>Pilra</i>                                           | 30.53                | 2.05       | 49.1               | 6.35     | 0.7    | 0.0001   |
| <i>Fcgr4</i>                                           | 21.44                | 1.41       | 40.61              | 5.49     | 0.91   | *        |
| <i>Cd74</i>                                            | 561.4                | 138.82     | 1154.89            | 275.43   | 1.04   | *        |
| <i>C5ar1</i>                                           | 29.55                | 2.39       | 63.28              | 5.48     | 1.1    | *        |
| <i>Cd52</i>                                            | 392.64               | 43.16      | 893.87             | 26.99    | 1.19   | *        |
| <i>Cd22</i>                                            | 12.8                 | 1.82       | 31.79              | 0.99     | 1.3    | *        |
| <i>Ccr12</i>                                           | 31.85                | 8.92       | 80.07              | 24.86    | 1.32   | *        |
| <i>Clec7a</i>                                          | 90.46                | 13.78      | 363.73             | 29.41    | 2.01   | *        |
| <i>Ltf</i>                                             | 189.98               | 15.34      | 983.46             | 46.61    | 2.37   | *        |
| <i>Ifitm6</i>                                          | 34.99                | 0.76       | 213.75             | 20.48    | 2.61   | *        |

| Comparison of Gene Families in Microglia Oldvs Young:: Figure 8b-i |                      |            |                    |          |            |          |
|--------------------------------------------------------------------|----------------------|------------|--------------------|----------|------------|----------|
| Gene names                                                         | Mean Young Microglia | STDV Young | Mean Old Microglia | STDV Old | log FC     | p-value* |
| <b>PURINORECEPTORS: P2X AND P2Y FAMILIES</b>                       |                      |            |                    |          |            |          |
| <i>P2rx7</i>                                                       | 0.473185             | 34.37      | 25.17              | 1.04     | -0.44      | 0.02     |
| <i>P2rx4</i>                                                       | 0.687457             | 32.96      | 43.12              | 1.69     | 0.41       | 0.03     |
| <i>P2rx1</i>                                                       | 0.238864             | 4.14       | 2.64               | 0.71     | -0.69      | 0.04     |
| <i>P2rx7b</i>                                                      | 0.083878             | 2.86       | 1.68               | 0        | -0.83      | 0.03     |
| <i>P2rx6</i>                                                       | 0.0735167            | 0.49       | 0.89               | 0.24     | 0.69       | 0.19     |
| <i>P2rx3</i>                                                       | 0.00502543           | 0.15       | 0.22               | 0.15     | 0.78       | 0.73     |
| <i>P2rx5</i>                                                       | 0                    | 0          | 0.19               | 0.14     | 27.77      | 0.13     |
| <i>P2rx7d</i>                                                      | 0.0190876            | 0.1        | 0.03               | 0.04     | -0.8       | 1        |
| <i>P2rx2</i>                                                       | 0.0345156            | 0.1        | 0.07               | 0.1      | -0.23      | 1        |
| <i>P2ry12</i>                                                      | 3781.22              | 326.8      | 2131.2             | 76.38    | -0.83      | *        |
| <i>P2ry13</i>                                                      | 614.13               | 70.26      | 346.84             | 7.74     | -0.82      | *        |
| <i>P2ry6</i>                                                       | 189.12               | 15.26      | 213.22             | 11.53    | 0.18       | 0.3      |
| <i>P2ry14</i>                                                      | 1.09                 | 0.27       | 1.65               | 0.62     | 0.61       | 0.2      |
| <i>P2ry10</i>                                                      | 0.67                 | 0.03       | 2.13               | 0.17     | 1.53       | 0        |
| <i>P2ry2</i>                                                       | 0.6                  | 0.27       | 1.29               | 0.52     | 1.34       | 0.02     |
| <i>P2ry1</i>                                                       | 0.31                 | 0.19       | 1.08               | 0.26     | 1.77       | 0.01     |
| <i>P2ry4</i>                                                       | 0.22                 | 0.08       | 0.35               | 0.11     | 0.96       | 0.31     |
| <b>CHEMOKINE RECEPTORS</b>                                         |                      |            |                    |          |            |          |
| <i>Ccr5</i>                                                        | 568.6                | 35.28      | 382.15             | 6.4      | -0.57      | 0.0006   |
| <i>Ccr1</i>                                                        | 20.97                | 3.66       | 37.51              | 5.37     | 0.86       | *        |
| <i>Ccr2</i>                                                        | 6.85                 | 0.96       | 43.14              | 1.7      | 2.65       | *        |
| <i>Ccr3</i>                                                        | 1.38                 | 0.29       | 2.12               | 1.02     | 0.75       | 0.09     |
| <i>Ccr4</i>                                                        | 0.23                 | 0.12       | 0.22               | 0.04     | -0.02      | 1        |
| <i>Ccr6</i>                                                        | 0.91                 | 0.36       | 0.82               | 0.3      | -0.21      | 0.78     |
| <i>Ccr7</i>                                                        | 0.12                 | 0.09       | 0.71               | 0.51     | 2.64       | 0.02     |
| <i>Ccr8</i>                                                        | 0                    | 0          | 0.14               | 0.1      | 2.36       | 1        |
| <i>Ccr9</i>                                                        | 0.07                 | 0.08       | 0.13               | 0.09     | -0.22      | 1        |
| <i>Ccr10</i>                                                       | 0.1                  | 0.08       | 0                  | 0        | -27        | 0.25     |
| <i>Cx3cr1</i>                                                      | 1493.9               | 87.7       | 1608.4             | 29.84    | 0.11       | 0.52     |
| <i>Cxcr4</i>                                                       | 12.3                 | 0.07       | 61.84              | 4.48     | 2.32       | *        |
| <i>Cxcr1</i>                                                       | 0.18                 | 0.08       | 0.22               | 0.17     | 0.04       | 1        |
| <i>Cxcr2</i>                                                       | 3.21                 | 1.51       | 14.48              | 3.81     | 2.23       | *        |
| <i>Cxcr3</i>                                                       | 2.17                 | 0.32       | 1.61               | 0.57     | -0.45      | 0.3      |
| <i>Cxcr5</i>                                                       | 0.19                 | 0.16       | 0.19               | 0.14     | 0.03       | 1        |
| <i>Cxcr6</i>                                                       | 0.28                 | 0.13       | 0.49               | 0.17     | 0.78       | 0.31     |
| <i>Cxcr7</i>                                                       | 1.84                 | 0.3        | 1.61               | 0.64     | -0.24      | 0.66     |
| <b>Fc RECEPTORS</b>                                                |                      |            |                    |          |            |          |
| <i>Fcgr3</i>                                                       | 1004.5               | 140.04     | 730.62             | 21.87    | -0.46      | 0.01     |
| <i>Fcgr2b</i>                                                      | 410.55               | 10.62      | 434.09             | 34.62    | 0.08       | 0.62     |
| <i>Fcgr1</i>                                                       | 289.36               | 46.37      | 192.82             | 8.46     | -0.59      | 0.0005   |
| <i>Fcgrt</i>                                                       | 44.55                | 2.85       | 37.76              | 2.67     | -0.23      | 0.2      |
| <i>Fcgr4</i>                                                       | 21.44                | 1.41       | 40.61              | 5.49     | 0.91       | *        |
| <i>Fcer1g</i>                                                      | 837.23               | 91.6       | 760.22             | 70.34    | -0.14      | 0.41     |
| <i>Fcer1a</i>                                                      | 0.67                 | 0.24       | 3.36               | 1.59     | 2.14       | *        |
| <i>Fcrl1</i>                                                       | 48.69                | 3.01       | 29.67              | 3.47     | -0.71      | 0.0001   |
| <i>Fcrl6</i>                                                       | 0.22                 | 0.09       | 0.12               | 0.1      | 0.03       | 1        |
| <b>IFITMS</b>                                                      |                      |            |                    |          |            |          |
| <i>Ifitm1</i>                                                      | 5.04                 | 0.37       | 19.35              | 5.75     | 1.91       | *        |
| <i>Ifitm2</i>                                                      | 10.53                | 1.17       | 41.64              | 5.59     | 1.93       | *        |
| <i>Ifitm3</i>                                                      | 60.94                | 4.07       | 242.05             | 6.06     | 1.99       | *        |
| <i>Ifitm5</i>                                                      | 0                    | 0          | 0.18               | 0.15     | 27.78      | 0.13     |
| <i>Ifitm6</i>                                                      | 34.99                | 0.76       | 213.75             | 20.48    | 2.61       | *        |
| <i>Ifitm7</i>                                                      | 0.23                 | 0.17       | 0.57               | 0.21     | 1.28       | 0.18     |
| <b>TOLL-LIKE RECEPTORS</b>                                         |                      |            |                    |          |            |          |
| <i>Tlr2</i>                                                        | 195.84               | 14.42      | 291.48             | 6.63     | 0.57       | 0.0006   |
| <i>Tlr7</i>                                                        | 133.53               | 8.94       | 133.56             | 1.86     | 0          | 1        |
| <i>Tlr4</i>                                                        | 47.67                | 4.89       | 40.42              | 4.91     | -0.23      | 0.19     |
| <i>Tlr3</i>                                                        | 39.42                | 4.27       | 59.18              | 2.6      | 0.58       | 0.001    |
| <i>Tlr1</i>                                                        | 26.25                | 2.36       | 22.42              | 1.75     | -0.23      | 0.23     |
| <i>Tlr6</i>                                                        | 22.71                | 0.53       | 17.02              | 1.86     | -0.43      | 0.03     |
| <i>Tlr13</i>                                                       | 10.77                | 1.05       | 11.57              | 1.35     | 0.09       | 0.69     |
| <i>Tlr9</i>                                                        | 8.63                 | 0.92       | 10.44              | 0.45     | 0.28       | 0.22     |
| <i>Tlr8</i>                                                        | 3.57                 | 0.7        | 7.7                | 1.7      | 1.17       | *        |
| <i>Tlr11</i>                                                       | 0.2                  | 0.16       | 0.24               | 0.21     | 0.19       | 1        |
| <i>Tlr12</i>                                                       | 31.52                | 1.47       | 37.52              | 3.21     | 0.25       | 0.18     |
| <i>Tlr5</i>                                                        | 5.04                 | 0.79       | 5.86               | 0.88     | 0.21       | 0.39     |
| <b>SIGLECS</b>                                                     |                      |            |                    |          |            |          |
| <i>Siglech</i>                                                     | 1501.57              | 124.57     | 1067.68            | 51.794   | -0.49      | 0.003    |
| <i>Siglece</i>                                                     | 17.11                | 1.18       | 17.9946            | 1.9121   | 0.08       | 0.7      |
| <i>Siglecg</i>                                                     | 1.82                 | 0.1        | 1.29965            | 0.57227  | -0.5       | 0.26     |
| <i>Siglec3/CD33</i>                                                | 56.56                | 0.66       | 51.7396            | 2.17884  | -0.12      | 0.5      |
| <i>Siglec5</i>                                                     | 20.49                | 1.1        | 25.78568           | 1.24789  | 0.32       | 0.09     |
| <i>Siglec1</i>                                                     | 1.14                 | 0.24       | 5.09596            | 2.74354  | 2.25       | *        |
| <i>Siglec15</i>                                                    | 0                    | 0          | 0.11               | 0.16     | 0.42       | 1        |
| <b>Scavenger Receptors</b>                                         |                      |            |                    |          |            |          |
| <i>Msr1</i>                                                        | 4.8                  | 0.69       | 7.31               | 1.83     | 0.61       | 0.12     |
| <i>Msr1v2</i>                                                      | 0.97                 | 0.49       | 0.98               | 0.76     | -0.04      | 1        |
| <i>Scara3</i>                                                      | 0.34                 | 0.15       | 1.95               | 1.96     | 2.62       | *        |
| <i>Scara5</i>                                                      | 0.36                 | 0.12       | 0.96               | 0.4      | 1.59       | 0.012    |
| <i>Marco</i>                                                       | 0.09                 | 0.06       | 8.09               | 11.43    | 6.25       | *        |
| <i>Cd163</i>                                                       | 3.7                  | 0.54       | 13.61              | 8.78     | 1.86       | *        |
| <i>Cd36</i>                                                        | 10.11                | 2.02       | 12.68              | 2.31     | 0.15101728 | 0.15     |
| <i>Scarb1</i>                                                      | 9.42                 | 0.99       | 9.59               | 0.37     | 1          | 1        |
| <i>Lrp1</i>                                                        | 196.48               | 24.24      | 152.73             | 11.8     | -0.37      | 0.03     |
| <i>Lrp10</i>                                                       | 55.16                | 6.81       | 65.36              | 4.24     | 0.24       | 0.17     |
| <i>Lrp6</i>                                                        | 5.35                 | 1.31       | 2.83               | 0.87     | -0.9       | 0        |
| <i>Lrp12</i>                                                       | 12.04                | 2.85       | 11.43              | 1.53     | -0.04      | 0.81     |
| <i>Lrp5</i>                                                        | 5.86                 | 0.4        | 4.54               | 0.25     | -0.39      | 0.16     |
| <i>Lrp11</i>                                                       | 2                    | 0.4        | 2.12               | 0.59     | 0.25       | 0.48     |
| <i>Lrp4</i>                                                        | 2.78                 | 0.37       | 2.24               | 0.46     | -0.31      | 0.36     |
| <i>Lrp8</i>                                                        | 0.3                  | 0.1        | 0.6                | 0.45     | 0.95       | 0.25     |

| <b>Comparison of Gene Families in Microglia Oldvs Young:: Figure 8b-I (continued)</b>                                                                      |                      |            |                    |          |        |          |
|------------------------------------------------------------------------------------------------------------------------------------------------------------|----------------------|------------|--------------------|----------|--------|----------|
| Gene names                                                                                                                                                 | Mean Young Microglia | STDV Young | Mean Old Microglia | STDV Old | log FC | p-value* |
| <b>Scavenger Receptors (continued)</b>                                                                                                                     |                      |            |                    |          |        |          |
| <i>Lrp2</i>                                                                                                                                                | 0.21                 | 0.06       | 0.69               | 0.7      | 1.37   | 0.08     |
| <i>Scarf1</i>                                                                                                                                              | 0.96                 | 0.5        | 1.2                | 0.82     | 0.41   | 0.58     |
| <i>Scarf2</i>                                                                                                                                              | 9.31                 | 0.94       | 8.1                | 0.18     | -0.18  | 0.45     |
| <i>Cd68</i>                                                                                                                                                | 442.9                | 90.95      | 466.69             | 48.59    | 0.08   | 0.65     |
| <i>Cd14</i>                                                                                                                                                | 128.14               | 14.64      | 116.5              | 13.22    | -0.14  | 0.42     |
| <i>Cd47</i>                                                                                                                                                | 71.73                | 0.98       | 75.34              | 6.74     | 0.08   | 0.66     |
| <i>Cxcl16</i>                                                                                                                                              | 73.65                | 9.26       | 105.13             | 6.39     | 0.52   | 0.002    |
| <i>Fpr2</i>                                                                                                                                                | 7.3                  | 0.78       | 39.81              | 3.61     | 2.44   | *        |
| <i>Srcrb4</i>                                                                                                                                              | 0.53                 | 0.19       | 0.63               | 0.45     | 0.39   | 0.69     |
| <i>Olr1</i>                                                                                                                                                | 0.61                 | 0.35       | 3.44               | 0.79     | 2.51   | *        |
| <i>Ager</i>                                                                                                                                                | 0.07                 | 0.1        | 0                  | 0        | -26.99 | 0.25     |
| *Unless otherwise indicated, all p values for comparison of young vs old microglia for the above transcripts are <math> < 10^{-5}</math> by EdgeR analysis |                      |            |                    |          |        |          |
